# Supplementary material for: Fixation of atmospheric CO2 as C1-feedstock by nickel(ii) complexes
Source: Royal Society of Chemistry journal article supplement (doi:10.1039/d0dt03887c), 2021-01-01
Supplement: d0dt03887c1.pdf [file d0dt03887c1.pdf]

## Supporting Information

### Fixation of atmospheric CO<sub>2</sub> as C1-feedstock by nickel(II) complexes

Sethuraman Muthuramalingam<sup>a</sup>, Marappan Velusamy<sup>b</sup>, and Ramasamy Mayilmurugan<sup>\*,a</sup>

<sup>a</sup>Bioinorganic Chemistry Laboratory/Physical Chemistry, School of Chemistry, Madurai Kamaraj University, Madurai 625021, India. Email: [mayilmurugan.chem@mkuniversity.ac.in](mailto:mayilmurugan.chem@mkuniversity.ac.in)

<sup>b</sup>Department of Chemistry, North Eastern Hill University, Shillong 793022, India.

---

#### Table of Contents

|                                                                                                             |    |
|-------------------------------------------------------------------------------------------------------------|----|
| <b>Figure S1.</b> <sup>1</sup> H and <sup>13</sup> C NMR spectra for L1                                     | 6  |
| <b>Figure S2.</b> <sup>1</sup> H and <sup>13</sup> C NMR spectra for L2                                     | 7  |
| <b>Figure S3.</b> <sup>1</sup> H and <sup>13</sup> C NMR spectra for L3                                     | 8  |
| <b>Figure S4.</b> <sup>1</sup> H and <sup>13</sup> C NMR spectra for L4                                     | 9  |
| <b>Figure S5.</b> Molecular structure of complex <b>1</b>                                                   | 10 |
| <b>Figure S6.</b> Optimized structures of complex <b>2 – 4</b> .                                            | 10 |
| <b>Figure S7.</b> Electronic spectra for <b>1 – 4</b>                                                       | 11 |
| <b>Figure S8.</b> CV and DPV for <b>1 – 3</b>                                                               | 12 |
| <b>Figure S9.</b> CV and DPV for <b>4</b>                                                                   | 13 |
| <b>Figure S10-S17.</b> NMR spectra for cyclic carbonates                                                    | 14 |
| <b>Figure S18.</b> Temperature depended yield and selectivity of propylene carbonate production by <b>4</b> | 21 |
| <b>Figure S19.</b> Influence of Et <sub>3</sub> N in the CO <sub>2</sub> fixation reaction                  | 22 |
| <b>Figure S20.</b> Influence of H <sub>2</sub> O in the CO <sub>2</sub> fixation reaction                   | 22 |
| <b>Figure S21.</b> Electronic spectra for the reaction of <b>4</b> with O <sub>2</sub> and CO <sub>2</sub>  | 23 |

|                                                                                                                    |    |
|--------------------------------------------------------------------------------------------------------------------|----|
| <b>Figure S22.</b> Steric map for complexes <b>1 - 4</b>                                                           | 24 |
| <b>Figure S23.</b> Electronic spectra for the reaction of <b>1</b> with CO <sub>2</sub>                            | 25 |
| <b>Figure S24.</b> ESI-MS spectra of complexes <b>1a</b>                                                           | 25 |
| <b>Figure S25.</b> FT-IR spectra of <b>1a – 4a</b>                                                                 | 26 |
| <b>Figure S26.</b> ESI-MS spectra of complexes <b>2a</b>                                                           | 27 |
| <b>Figure S27.</b> Electronic spectral change of <b>2</b> with CO <sub>2</sub>                                     | 27 |
| <b>Figure S28.</b> Kinetic behavior for <b>2</b> with CO <sub>2</sub>                                              | 28 |
| <b>Figure S29.</b> The reaction of <b>2a</b> with epichlorohydrin                                                  | 28 |
| <b>Figure S30.</b> ESI-MS spectra of complexes <b>3a</b>                                                           | 29 |
| <b>Figure S31.</b> Electronic spectral change of <b>3</b> with CO <sub>2</sub>                                     | 29 |
| <b>Figure S32.</b> ESI-MS spectra of complexes <b>4a</b>                                                           | 30 |
| <b>Figure S33.</b> Electronic spectral change of <b>4</b> with CO <sub>2</sub>                                     | 30 |
| <b>Figure S34.</b> Kinetic behavior for <b>4</b> with CO <sub>2</sub>                                              | 31 |
| <b>Figure S35.</b> The reaction of <b>4a</b> with epichlorohydrin                                                  | 31 |
| <b>Figure S36.</b> Electronic spectral change of complex <b>1, 1a</b> and <b>1a + LiClO<sub>4</sub></b>            | 32 |
| <b>Figure S37.</b> Electronic spectral change of complex <b>2, 2a</b> and <b>2a + LiClO<sub>4</sub></b>            | 32 |
| <b>Figure S38.</b> Electronic spectral change of complex <b>3, 3a</b> and <b>3a + LiClO<sub>4</sub></b>            | 33 |
| <b>Figure S39.</b> ESI-MS spectral correlation of <b>4</b> and recovered catalyst <b>4</b>                         | 34 |
| <b>Figure S40.</b> Recyclability test for <b>4</b>                                                                 | 35 |
| <b>Figure S41.</b> ORTEP plot for <b>1a, 2a</b> and <b>4a</b>                                                      | 36 |
| <b>Table S1.</b> Bond distance and bond angle for <b>1</b>                                                         | 37 |
| <b>Table S2.</b> Calculated bond distance and bond angle for <b>2 - 4</b> by DFT method                            | 38 |
| <b>Table S3.</b> The electronic spectral, redox data of the nickel(II) complexes and their CO <sub>2</sub> adducts | 39 |
| <b>Table S4.</b> Optimization of the reaction of propylene oxide with CO <sub>2</sub> using <b>4</b>               | 40 |
| <b>Table S5.</b> Bond distance and bond angles for <b>1a</b> and <b>2a</b>                                         | 41 |
| <b>Table S6.</b> Bond distance and bond angles for <b>4a</b>                                                       | 42 |
| <b>Table S7.</b> Crystal data and structure refinement for <b>1, 1a, 2a,</b> and <b>4a</b>                         | 43 |

**Materials:** Commercially available chemicals were used without further purification. 1-methylhomopiperazine, Ni(ClO<sub>4</sub>)<sub>2</sub>·6H<sub>2</sub>O, 2-quinolylchloride hydrochloride, 2-vinyl pyridine, 2-picolychloride hydrochloride, 2-chloromethyl-4-methoxy-3,5-dimethylpyridine hydrochloride, NaBPh<sub>4</sub>, tetrabutylammonium perchlorate (TBAP), triethylamine, and chloroform-*d* were purchased from Aldrich chemicals. Sodium hydroxide, sodium hydrogen carbonate, sodium sulfate anhydrous, lithium perchlorate, acetic acid, silica gel, acetonitrile, chloroform, hexane, and toluene were purchased from Merck, India and used after appropriate distillation or purification.

**Instrumentation.** The NMR spectra were recorded on a 300 MHz Bruker. ESI-Mass spectra recorded using a Thermo LC-MS instrument. UV-vis spectra and kinetic data obtained using the Agilent diode array spectrometer (Agilent 8453). Elemental analyses carried out using a Heraeus Vario Elemental automatic analyzer. Cyclic Voltammetry (CV) performed using a three-electrode cell configuration (CHI, model 440). A platinum sphere (acetonitrile medium), platinum wire, and Ag(s)/Ag<sup>+</sup> were used as working, auxiliary, and reference electrodes respectively. The Bu<sub>4</sub>NClO<sub>4</sub> were used as supporting electrolyte in acetonitrile. The  $E_{1/2}$  values were observed under identical conditions. GC-MS and GC analysis performed on Agilent 5977E GCMSD using HP-5 MS ultra-inert (30 m × 250 μm × 0.25 μm) capillary column.

**X-ray Crystal Structure Analysis.** Single crystal X-ray diffraction measurements were performed on the Agilent Technologies Supernova-E CCD diffractometer. The suitable single crystal of **1**, **1a**, **2a**, and **4a** with suitable size were selected from the mother liquor and immersed in paraffin oil, then mounted on the tip of glass fibre. The structures were solved by direct methods using the program SHELXS-2013. Refinement and all further calculations were carried out using SHELXL-2013. The H-atoms were included in calculated positions and treated as riding atoms using the SHELXL default parameters. The non-H atoms were refined anisotropically, using weighted full-matrix least-squares on  $F^2$ . CCDC 1975592, 1975593, 1975594, and 1975598 are containing the supplementary crystallographic data for this paper. These data can be obtained free of charge from The Cambridge Crystallographic Data Centre via [www.ccdc.cam.ac.uk/data\\_request/cif](http://www.ccdc.cam.ac.uk/data_request/cif).

### NMR data for Cyclic carbonates:

**4-Methyl-1,3-dioxolan-2-one:**  $^1\text{H}$  NMR (300 MHz,  $\text{CDCl}_3$ ):  $\delta = 4.75\text{-}4.82$  (m, 1H), 4.45-4.51 (m, 1H), 3.91-3.97 (m, 1H), 1.36 (d,  $J = 1.37$  Hz, 3H) ppm.  $^{13}\text{C}$  NMR (300 MHz,  $\text{CDCl}_3$ ):  $\delta$ , 155.52, 74.08, 71.09, 19.60 ppm. GC-MS ( $m/z$ ): 102.01.

**4-Phenyl-1,3-dioxolan-2-one:**  $^1\text{H}$  NMR (300 MHz,  $\text{CDCl}_3$ ):  $\delta = 7.21\text{-}7.40$  (m, 5H), 5.66-5.71 (t,  $J = 5.69$  Hz, 1H), 4.78-4.83 (t,  $J = 4.81$  Hz, 1H), 4.26-4.32 (t,  $J = 4.29$  Hz, 1H) ppm.  $^{13}\text{C}$  NMR (300 MHz,  $\text{CDCl}_3$ ):  $\delta = 155.38, 136.23, 130.06, 129.57, 126.30, 78.43, 71.67$  ppm. GC-MS ( $m/z$ ): 164.10.

**1,3-benzodioxolan-2-one:**  $^1\text{H}$  NMR (300 MHz,  $\text{CDCl}_3$ ):  $\delta = 4.64$  (m, 2H), 1.73 (m, 2H), 1.48 (m, 4H), 1.34 (m, 2H) ppm.  $^{13}\text{C}$  NMR (300 MHz,  $\text{CDCl}_3$ ):  $\delta = 155.82, 76.21, 27.06, 24.45$  ppm. GC-MS ( $m/z$ ): 142.20.

**4-(chloromethyl)-1,3-dioxolan-2-one:**  $^1\text{H}$  NMR (300 MHz,  $\text{CDCl}_3$ ):  $\delta = 5.01$  (m, 1H), 4.57-4.62 (t,  $J = 4.60$  Hz, 1H), 4.43 (dd,  $J = 4.42$  Hz, 1H), 3.79 (m, 2H).  $^{13}\text{C}$  NMR (300 MHz,  $\text{CDCl}_3$ ):  $\delta = 154.66, 74.78, 67.38, 44.20$  ppm. GC-MS ( $m/z$ ): 135.90.

**4-Butyl 1,3-dioxolan-2-one:**  $^1\text{H}$  NMR (300 MHz,  $\text{CDCl}_3$ ):  $\delta = 4.60\text{-}4.80$  (m, 1H), 4.46-4.49 (t,  $J = 4.47$  Hz, 1H), 3.98 (m, 1H), 1.22-1.33 (m, 6H), 0.84 (t,  $J = 0.84$  Hz, 3H) ppm.  $^{13}\text{C}$  NMR (300 MHz,  $\text{CDCl}_3$ ):  $\delta = 155.48, 77.25, 69.84, 33.77, 26.68, 22.48, 14.01$  ppm. GC-MS ( $m/z$ ): 144.20.

**4-ethyl-1,3-dioxolan-2-one:**  $^1\text{H}$  NMR (300 MHz,  $\text{CDCl}_3$ ):  $\delta = 4.48$  (m, 1H), 4.30 (m, 1H), 4.01 (m, 1H), 1.34 (m, 2H), 0.92 (t, 3H).  $^{13}\text{C}$  NMR (300 MHz,  $\text{CDCl}_3$ ):  $\delta = 155.91, 78.51, 69.52, 24.35, 13.92$  ppm. GC-MS ( $m/z$ ): 116.10.

**4,4-dimethyl-1,3-dioxolan-2-one:**  $^1\text{H}$  NMR (300 MHz,  $\text{CDCl}_3$ ):  $\delta = 4.06$  (m, 2H), 1.46 (s, 6H).  $^{13}\text{C}$  NMR (300 MHz,  $\text{CDCl}_3$ ):  $\delta = 154.16, 87.68, 75.41, 27.63$  ppm. GC-MS ( $m/z$ ): 116.00.

**4-(allyloxymethyl)-1,3-dioxolan-2-one:**  $^1\text{H}$  NMR (300 MHz,  $\text{CDCl}_3$ ): 5.73 (m, 1H), 5.17 (m, 2H), 4.71 (m, 1H), 4.40 (m, 1H), 4.25 (m, 1H), 3.90 (m, 2H), 3.58 (m, 2H).  $^{13}\text{C}$  NMR (300 MHz,  $\text{CDCl}_3$ ):  $\delta = 155.41, 133.96, 117.23, 77.67, 69.14, 66.55, 66.12$  ppm. GC-MS ( $m/z$ ): 158.00.

**Kinetic Studies.** The  $\text{CO}_2$  fixation kinetics has been studied by time-dependent spectrophotometry measurements at 25 °C. The intermediates  $[(\text{LNi})_2(\text{CO}_3)]^{2+}$  were generated by treating the stoichiometric amount of complexes **1** - **4** ( $1 \times 10^{-3}$  M) with  $\text{CO}_2$  in the presence of  $\text{Et}_3\text{N}$  (2

equivalents) in acetonitrile. The formation constant of the intermediates  $[(\text{LNi})_2(\text{CO}_3)]^{2+}$  has been determined by monitoring the new absorbance bands around at 592 - 681 nm.

The intermediate  $[(\text{LNi})_2(\text{CO}_3)]^{2+}$  was freshly generated from **1** – **4** ( $1 \times 10^{-3}$  M) with 2 equivalents of  $\text{Et}_3\text{N}$  in the presence of 1 bar  $\text{CO}_2$  in acetonitrile. After reaching maximum intensity at 592 - 693 nm, the substrate epichlorohydrin has been added via microsyringe into the reaction mixture at 70 °C. Then, the reaction was carefully monitored by diode array spectrometer and the decay constants of the  $[(\text{LNi})_2(\text{CO}_3)]^{2+}$  were determined. After a while, the reaction mixture was passed through a silica column and the formation of cyclic carbonate was confirmed by GC-MS/GC and  $^1\text{H}$  and  $^{13}\text{C}$  NMR.

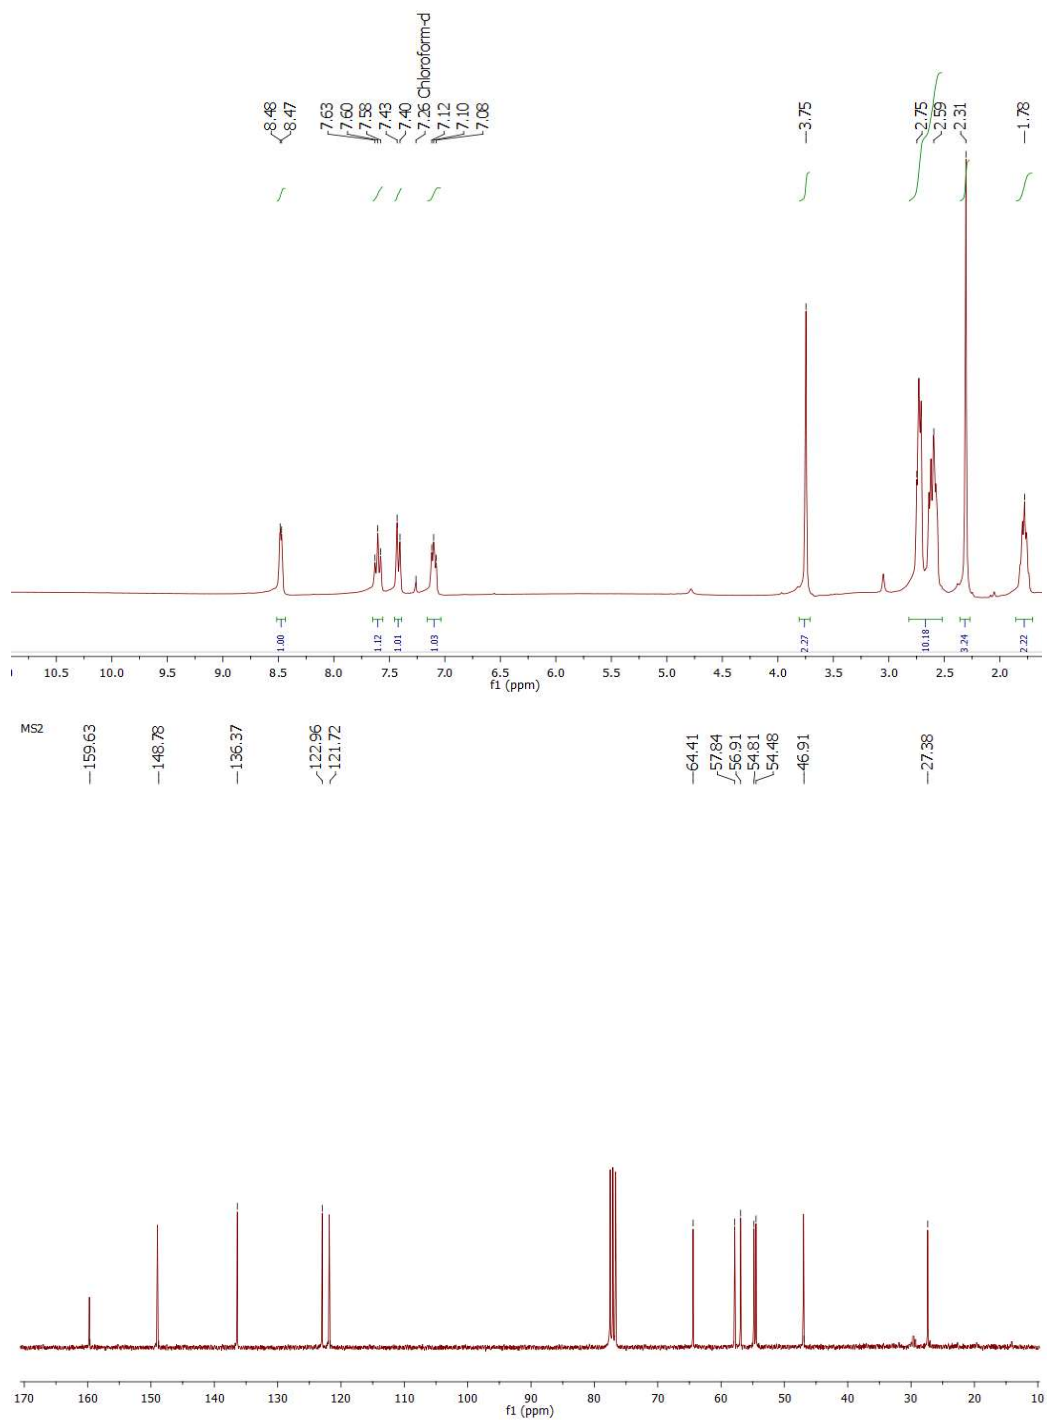

**Figure S1.** <sup>1</sup>H and <sup>13</sup>C NMR spectra for L1 in CDCl<sub>3</sub>.

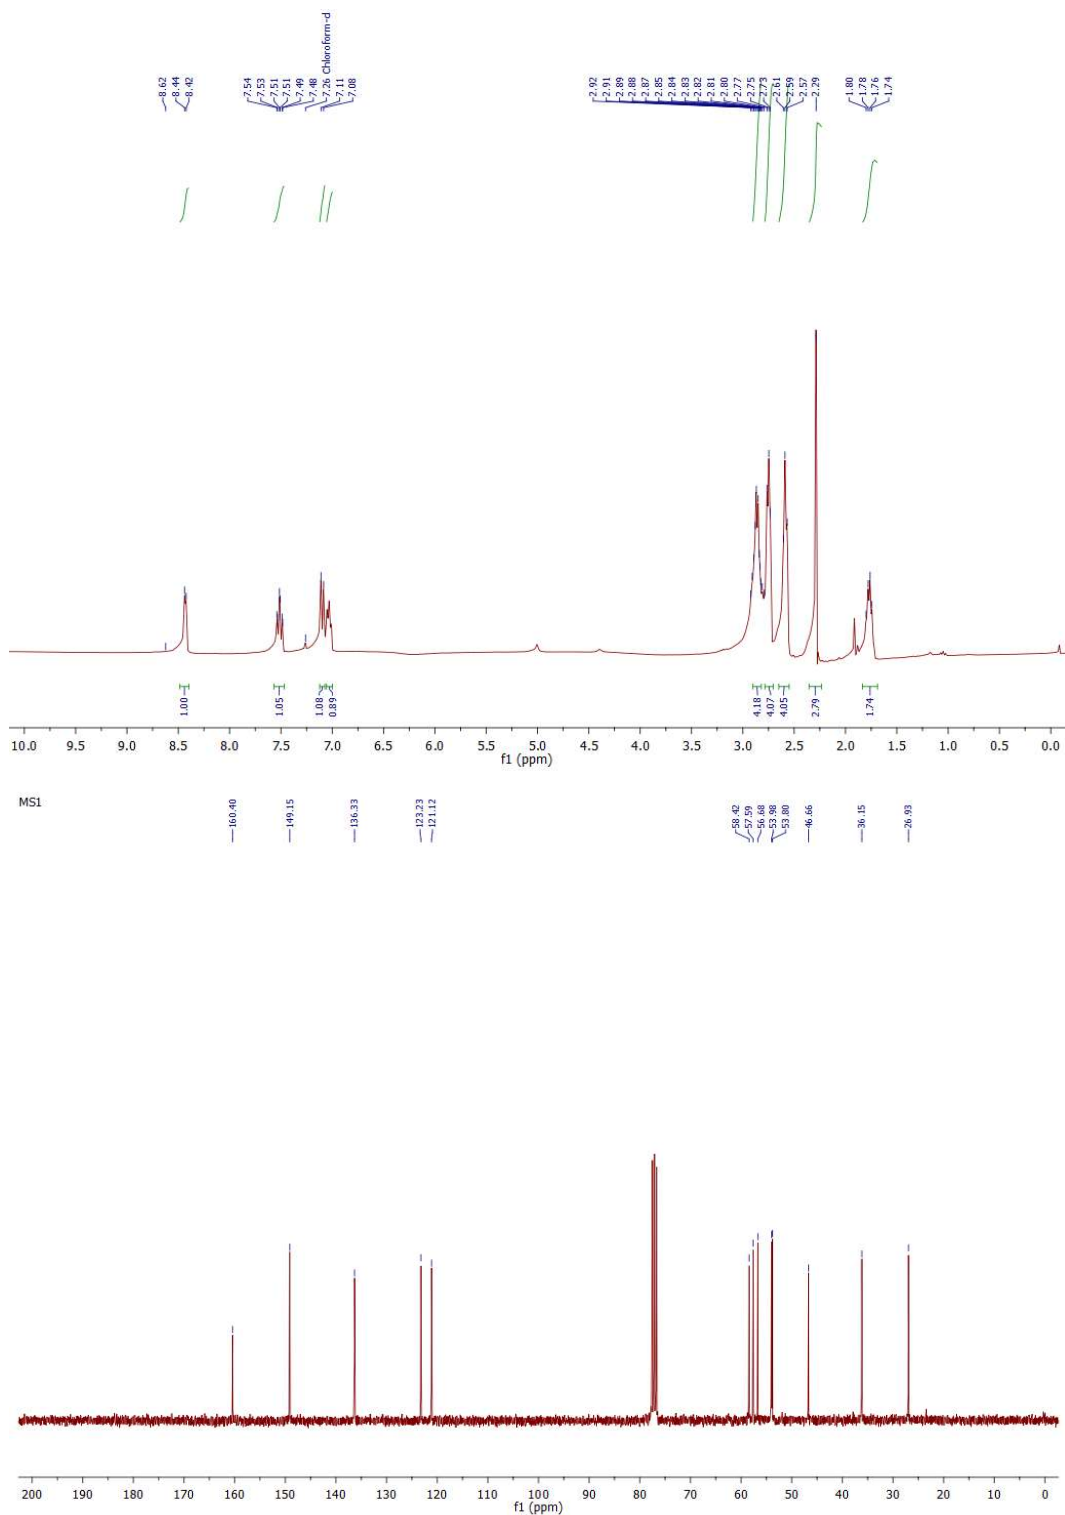

**Figure S2.** <sup>1</sup>H and <sup>13</sup>C NMR spectra for L2 in CDCl<sub>3</sub>.

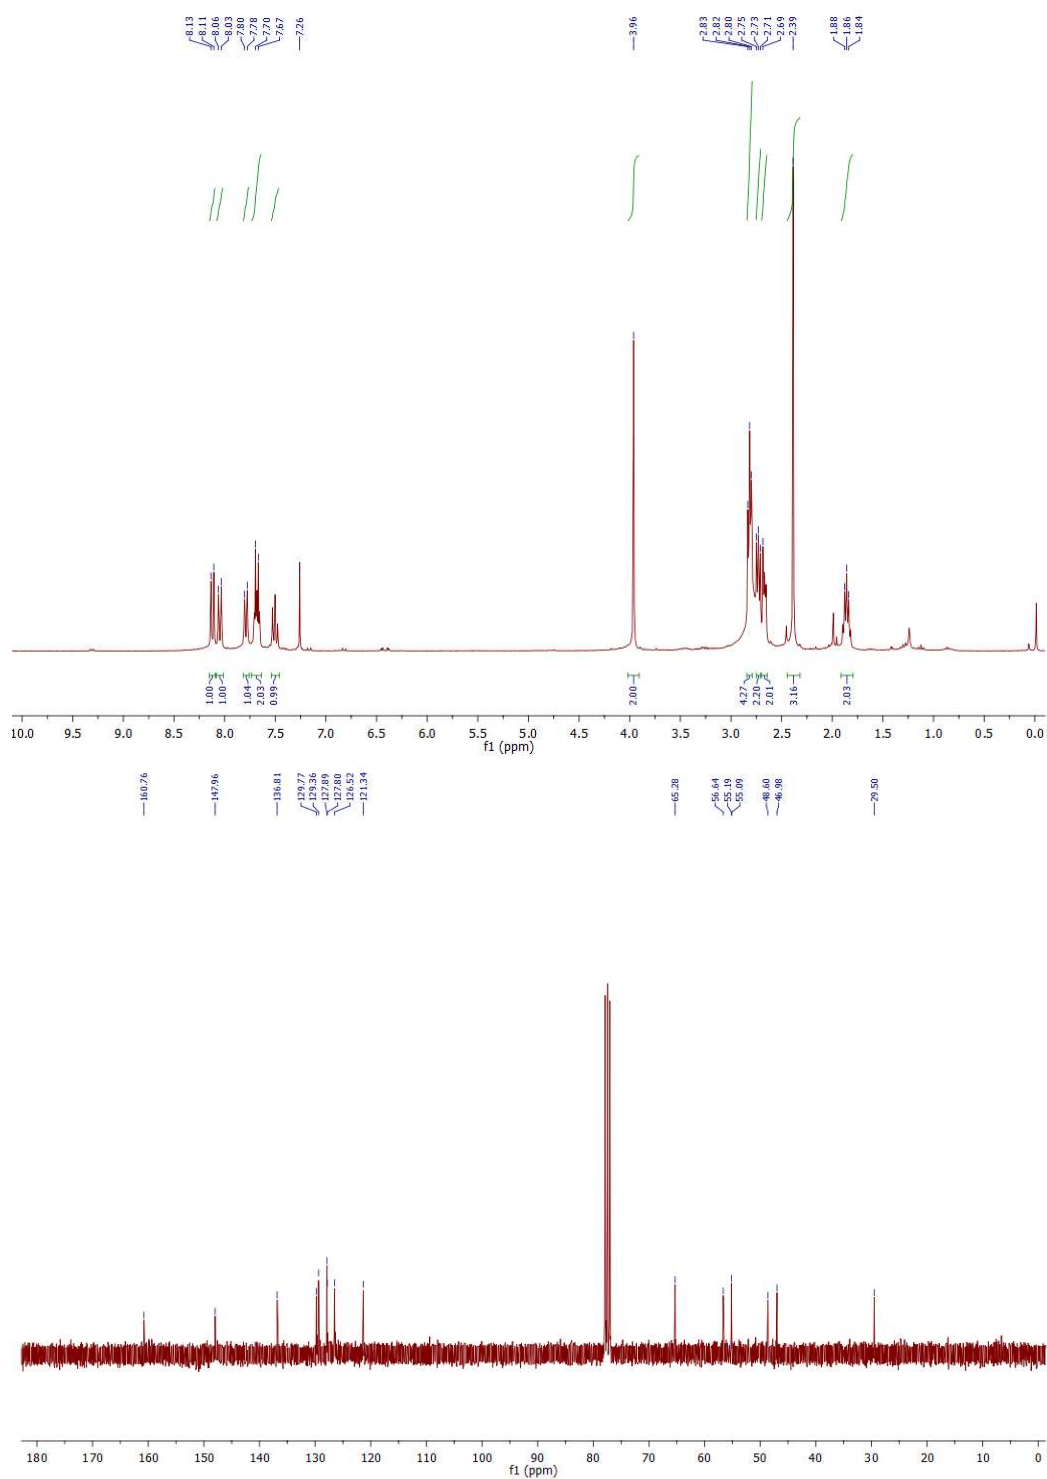

**Figure S3.** <sup>1</sup>H and <sup>13</sup>C NMR spectra for L3 in CDCl<sub>3</sub>.



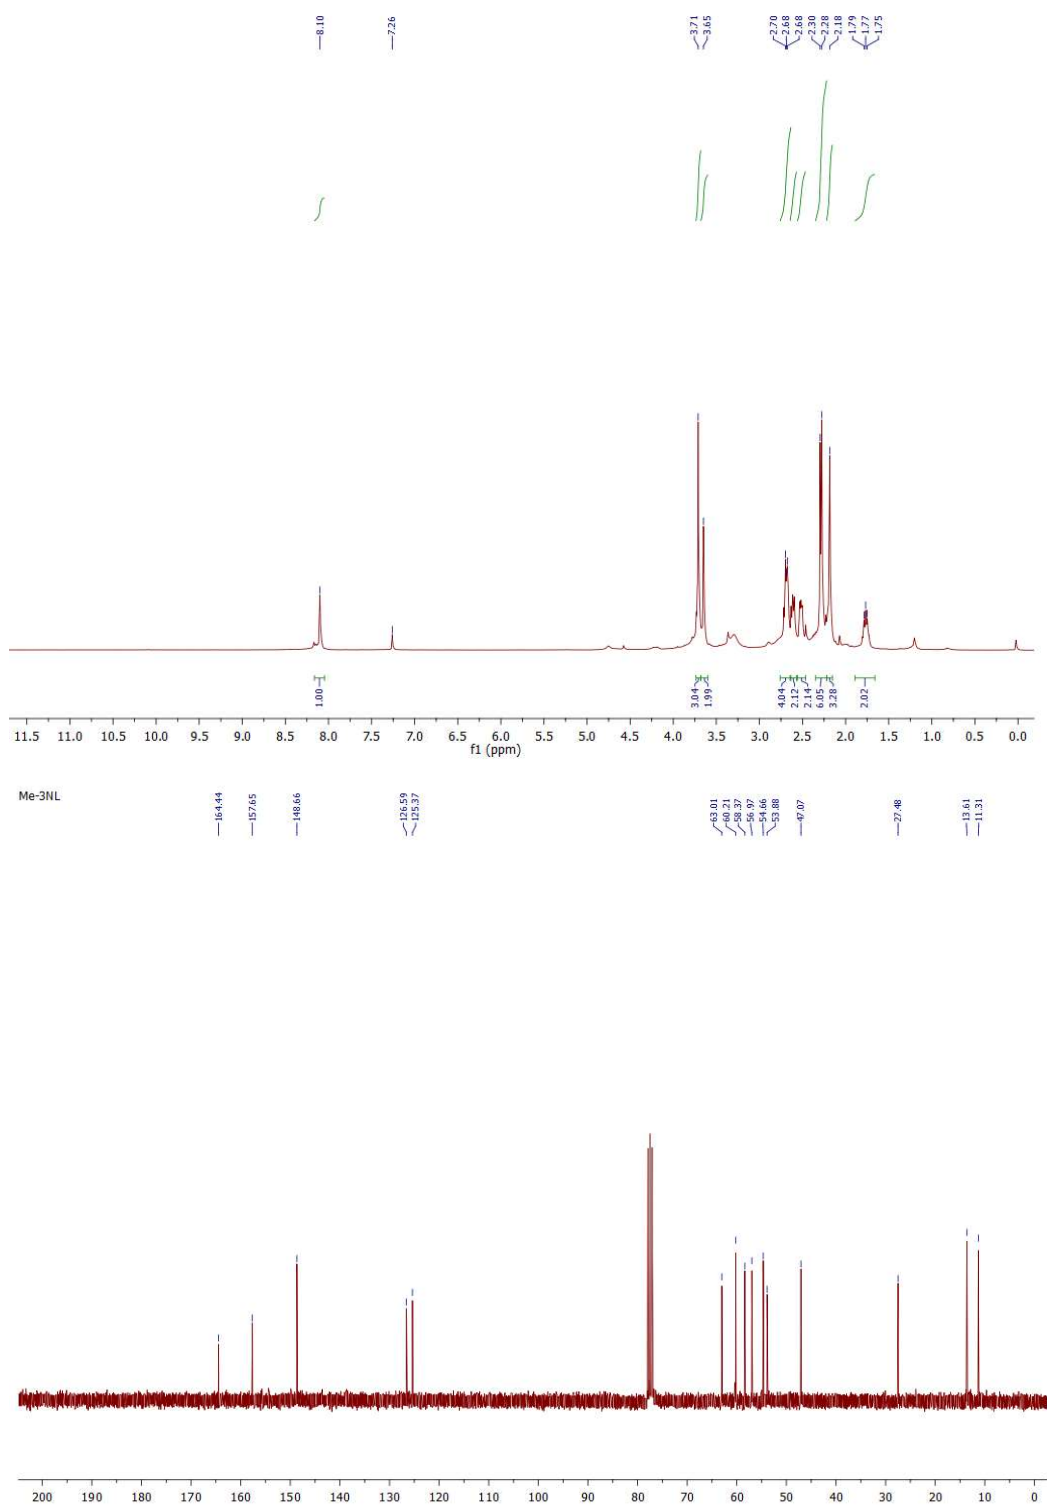

**Figure S4.**  $^1\text{H}$  and  $^{13}\text{C}$  NMR spectra for L4 in  $\text{CDCl}_3$ .

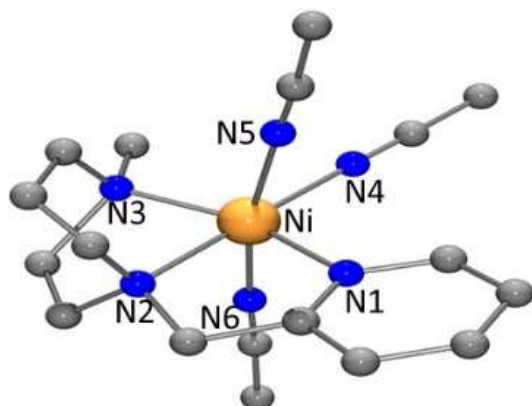

**Figure S5.** Molecular structure of  $[\text{Ni}(\text{L1})(\text{CH}_3\text{CN})_3](\text{BPh}_4)_2$ , **1**. The hydrogen atoms and  $\text{BPh}_4^-$  are omitted for clarity.

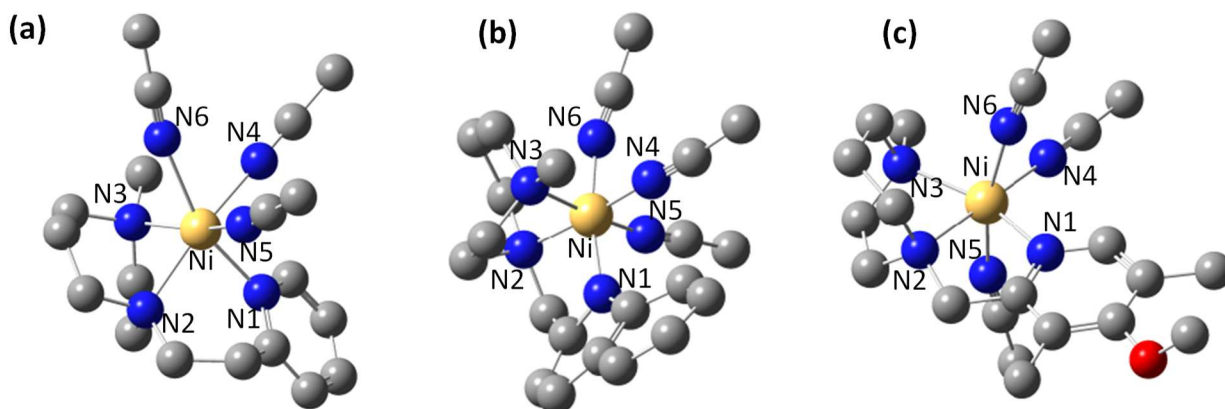

**Figure S6.** Optimized structure of **2** (a), **3** (b) and **4** (c) using B3LYP 631-G/ LANL2DZ basis set.

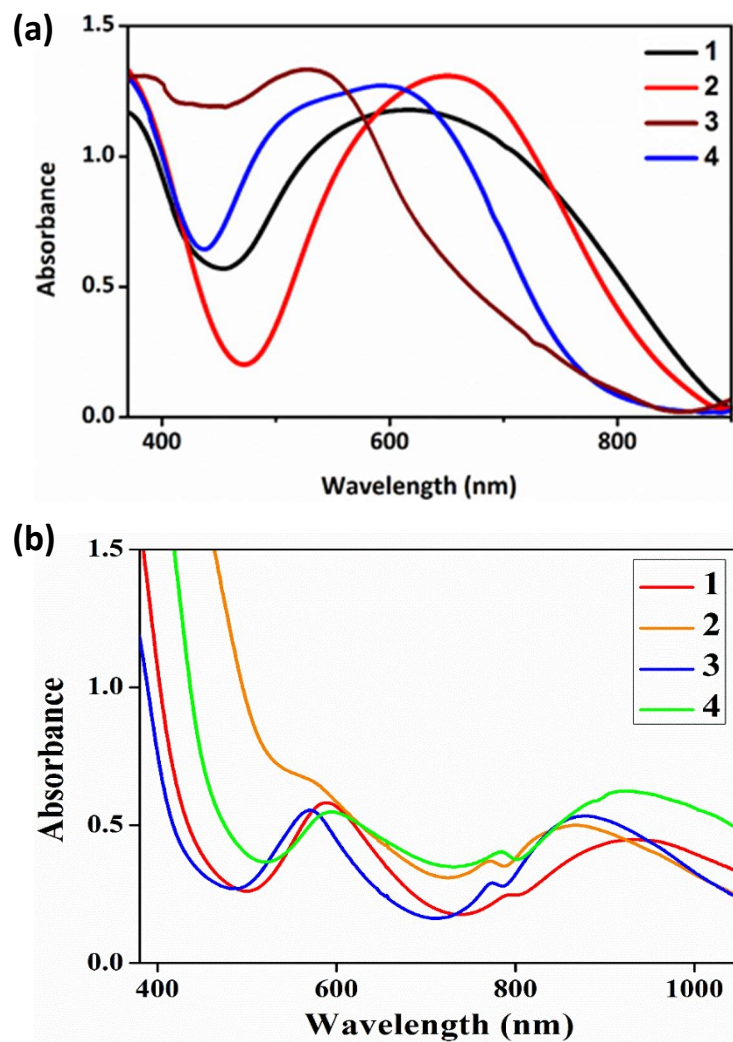

**Figure S7.** (a) Solid-state absorption spectra of **1** – **4**. (b) Electronic spectra of **1** – **4** ( $1 \times 10^{-3}$  M) in acetonitrile at 25 °C.

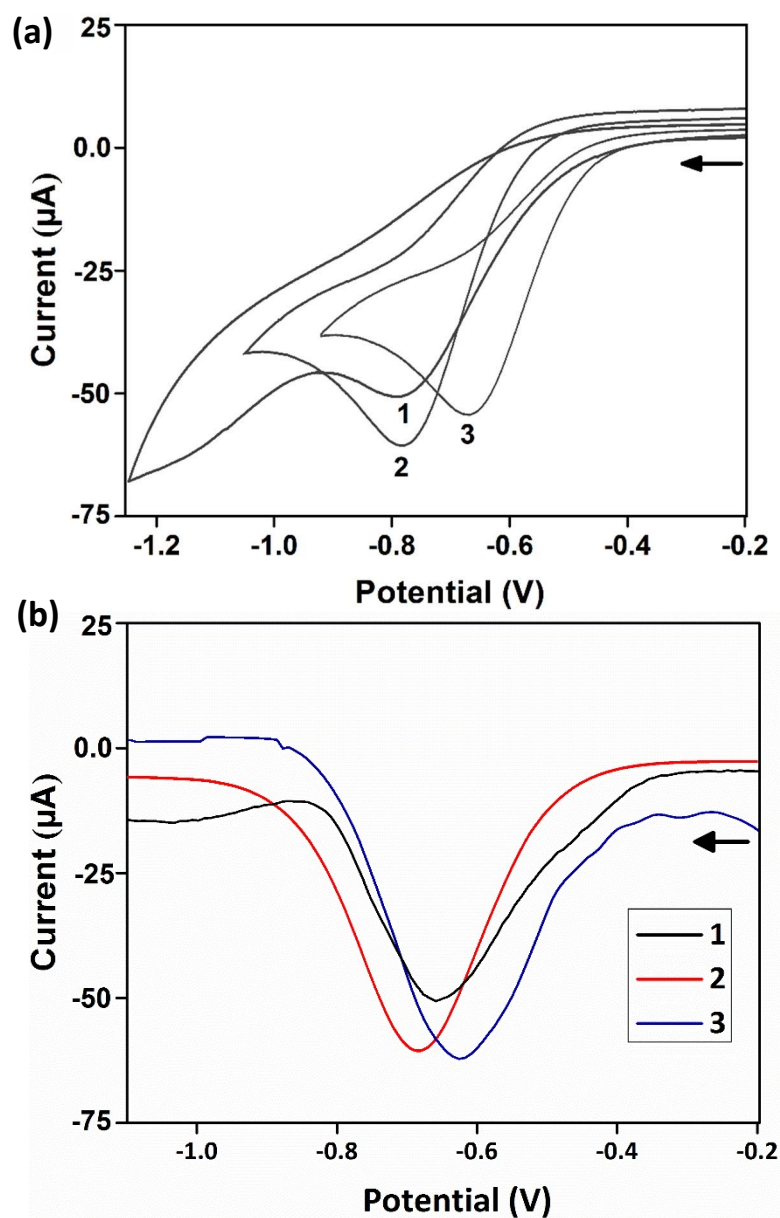

**Figure S8.** (a) Cyclic voltammograms and (b) DPV of **1 - 3** ( $1 \times 10^{-3}$  M) in acetonitrile at 25 °C. Supporting electrolyte: TBAP (0.1 M); Reference electrode: Ag/Ag<sup>+</sup> (non-aqueous); Working electrode: Pt-sphere. Scan rate = 100 mV s<sup>-1</sup>.

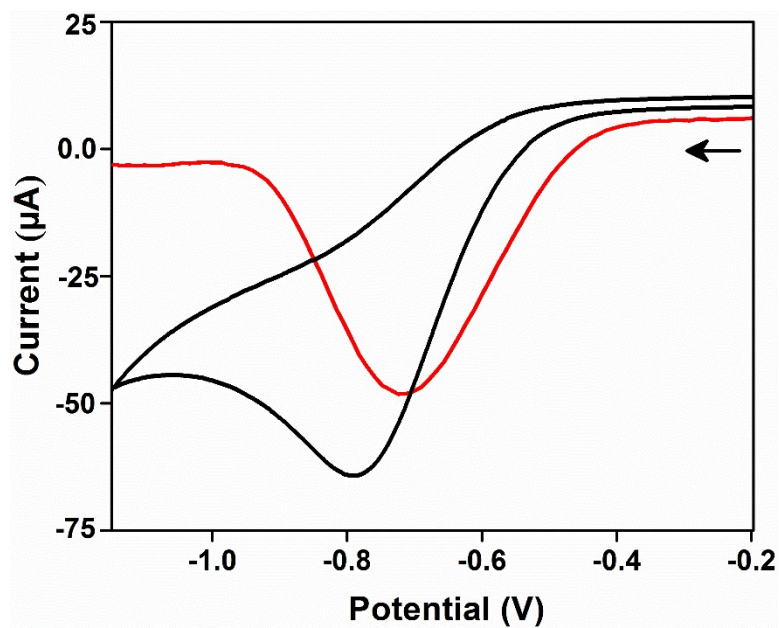

**Figure S9.** Cyclic voltammograms and DPV of **4** ( $1 \times 10^{-3}$  M) in acetonitrile at 25 °C. Supporting electrolyte: TBAP (0.1 M); Reference electrode: Ag/Ag<sup>+</sup> (non-aqueous); Working electrode: Pt-sphere. Scan rate = 100 mV s<sup>-1</sup>.

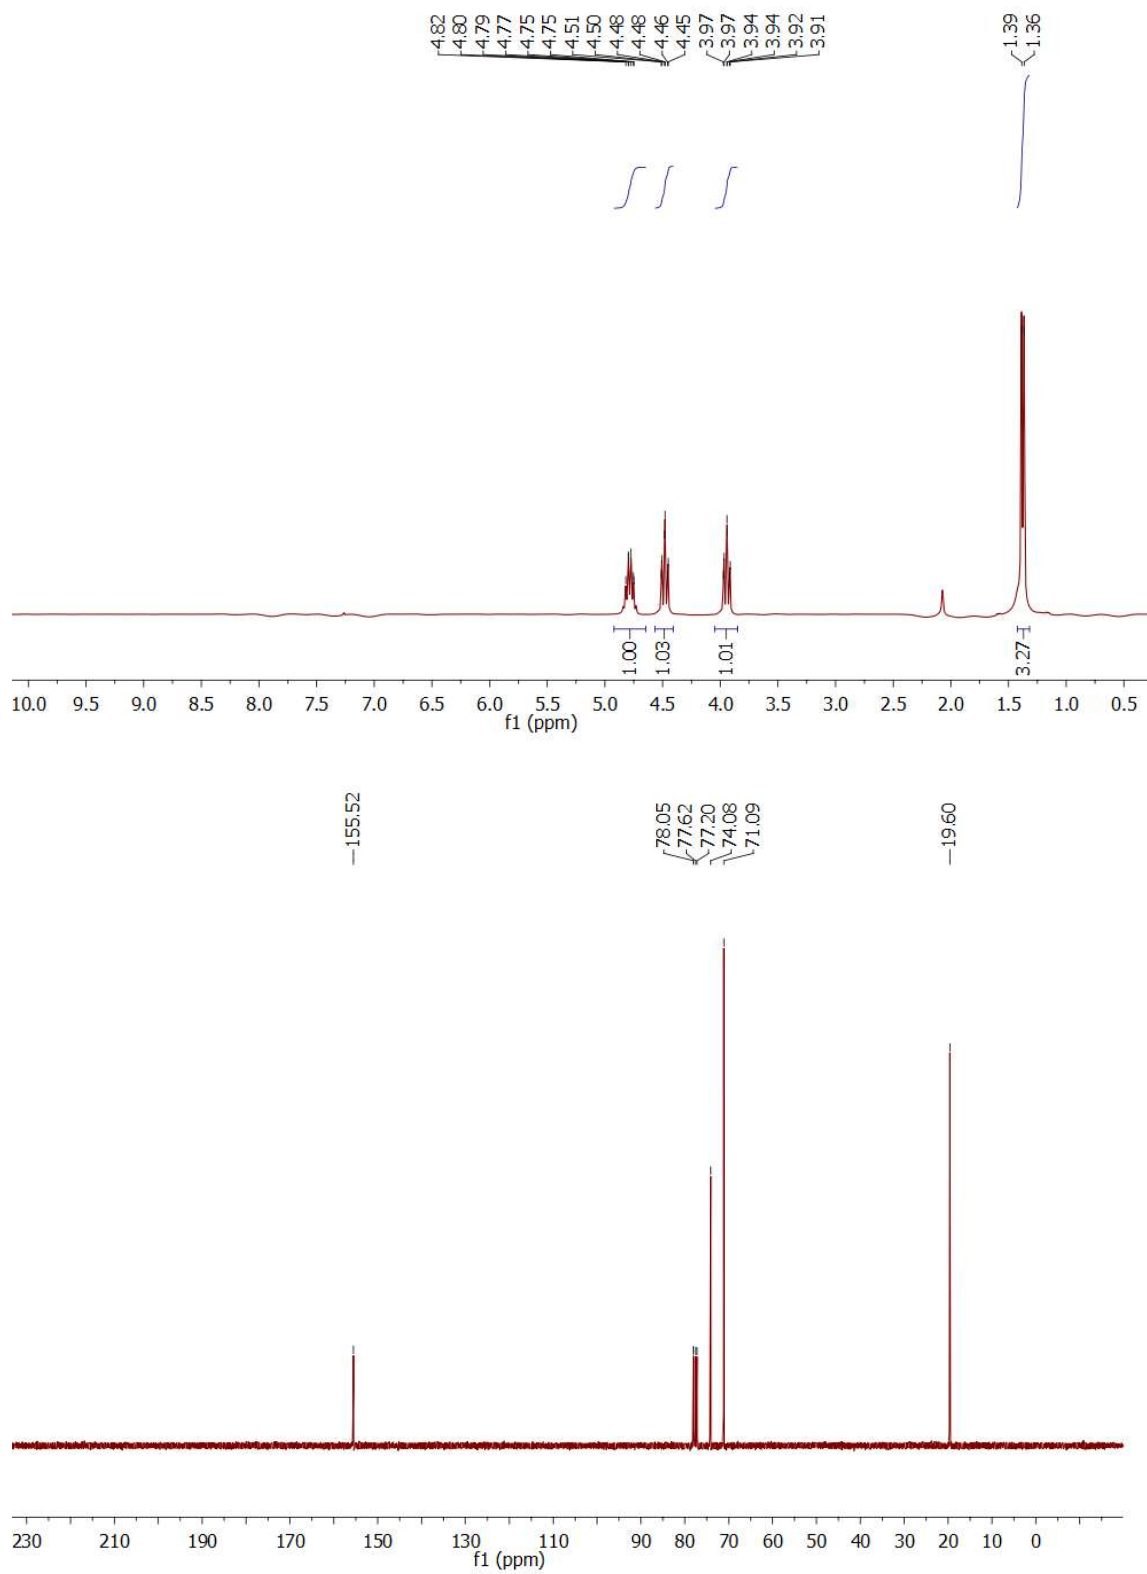

**Figure S10.** <sup>1</sup>H and <sup>13</sup>C NMR spectra of 4-methyl-1,3-dioxolan-2-one in CDCl<sub>3</sub>.

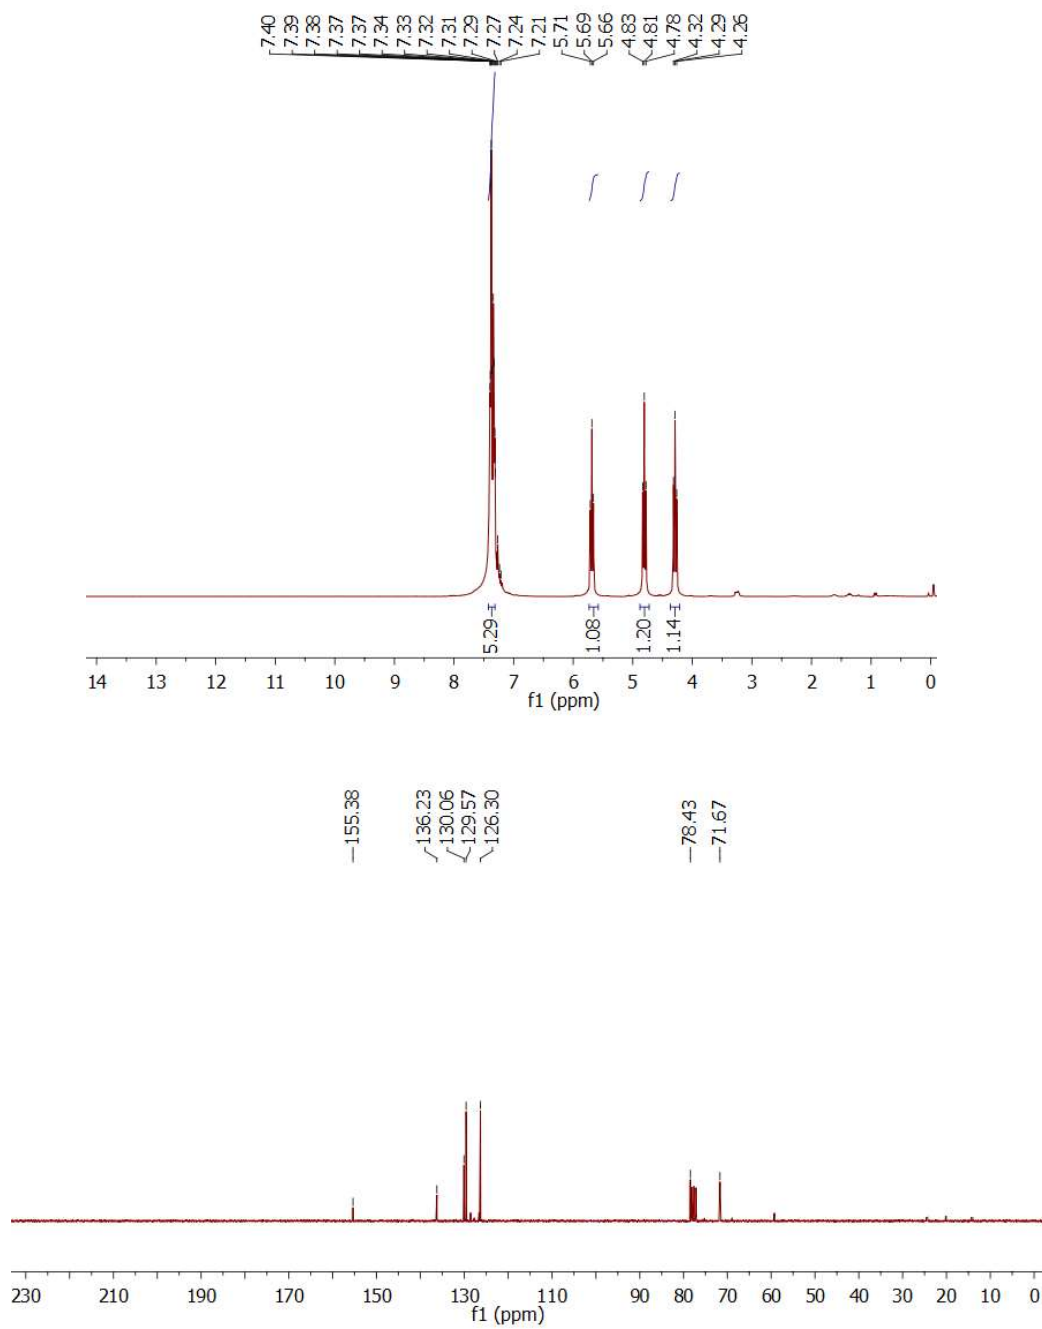

**Figure S11.** <sup>1</sup>H and <sup>13</sup>C NMR spectra of 4-phenyl-1,3-dioxolan-2-one in CDCl<sub>3</sub>.

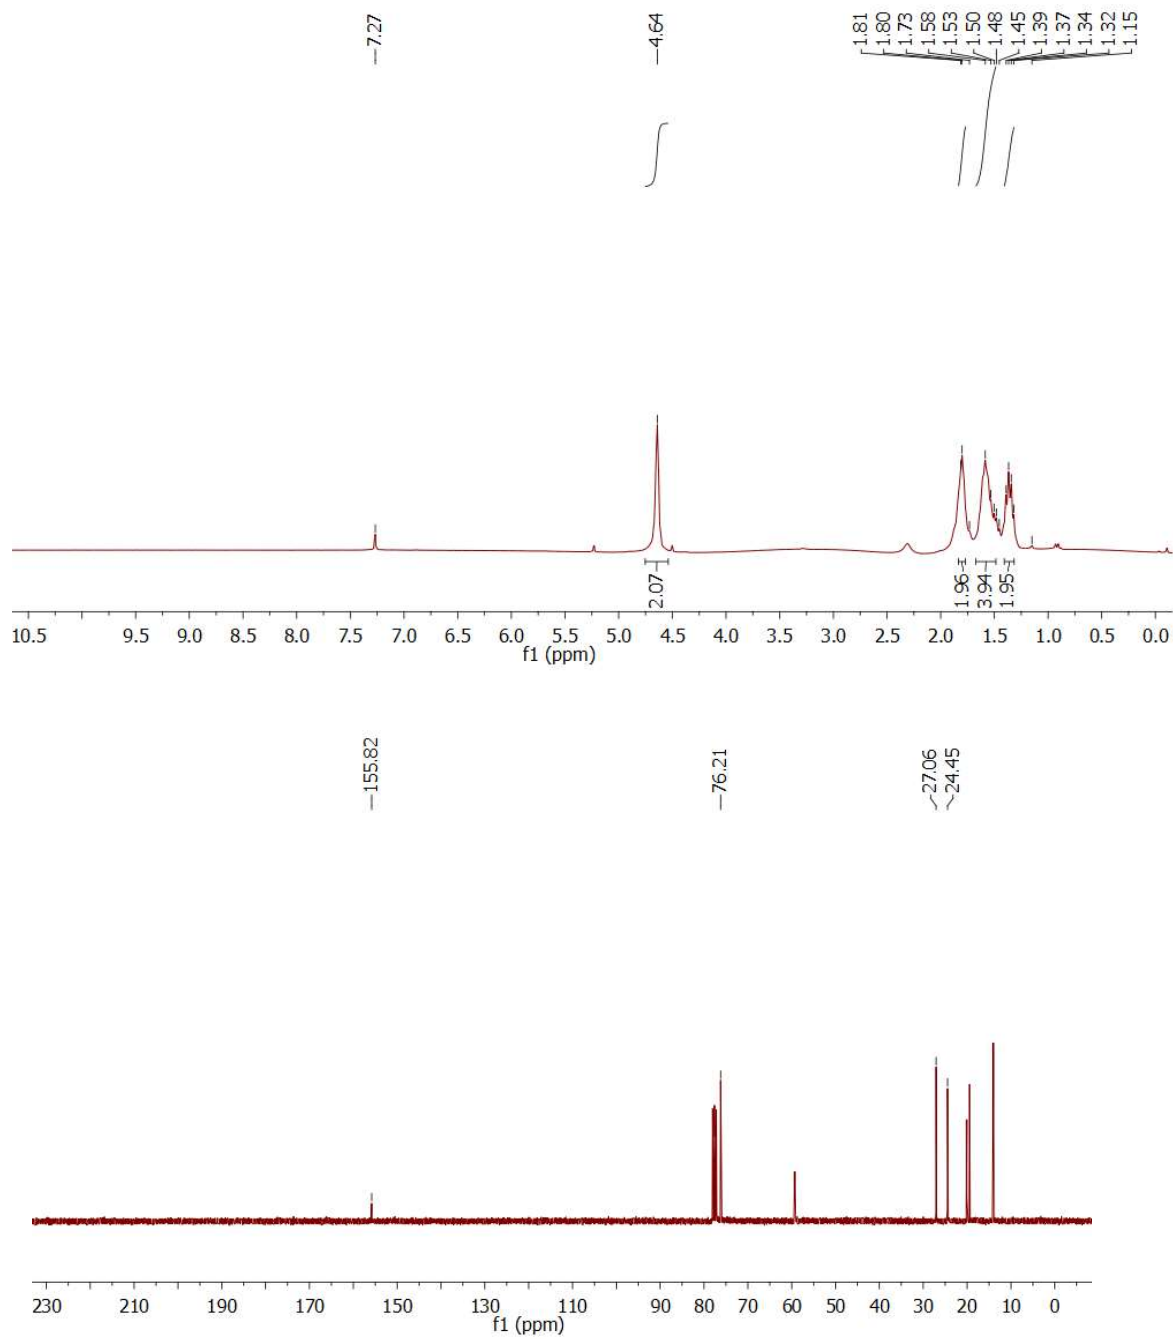

**Figure S12.** <sup>1</sup>H and <sup>13</sup>C NMR spectra of 1,3-benzodioxolan-2-one in CDCl<sub>3</sub>.



SMC1

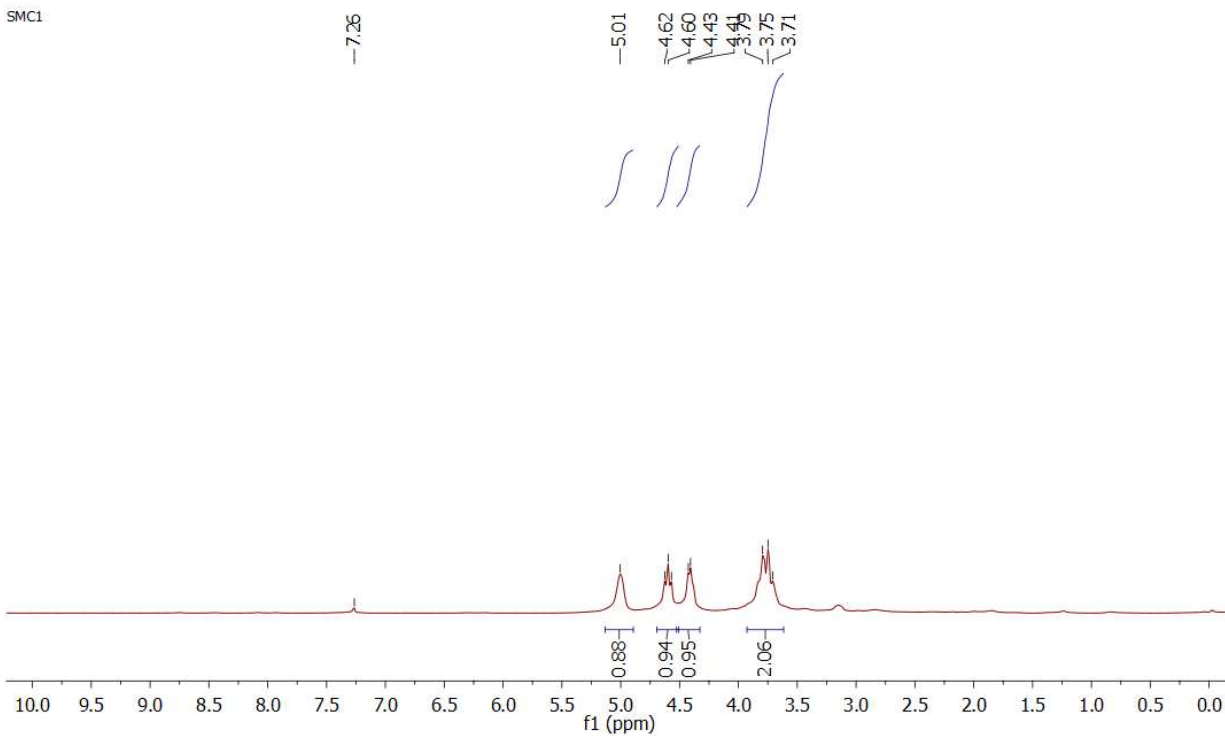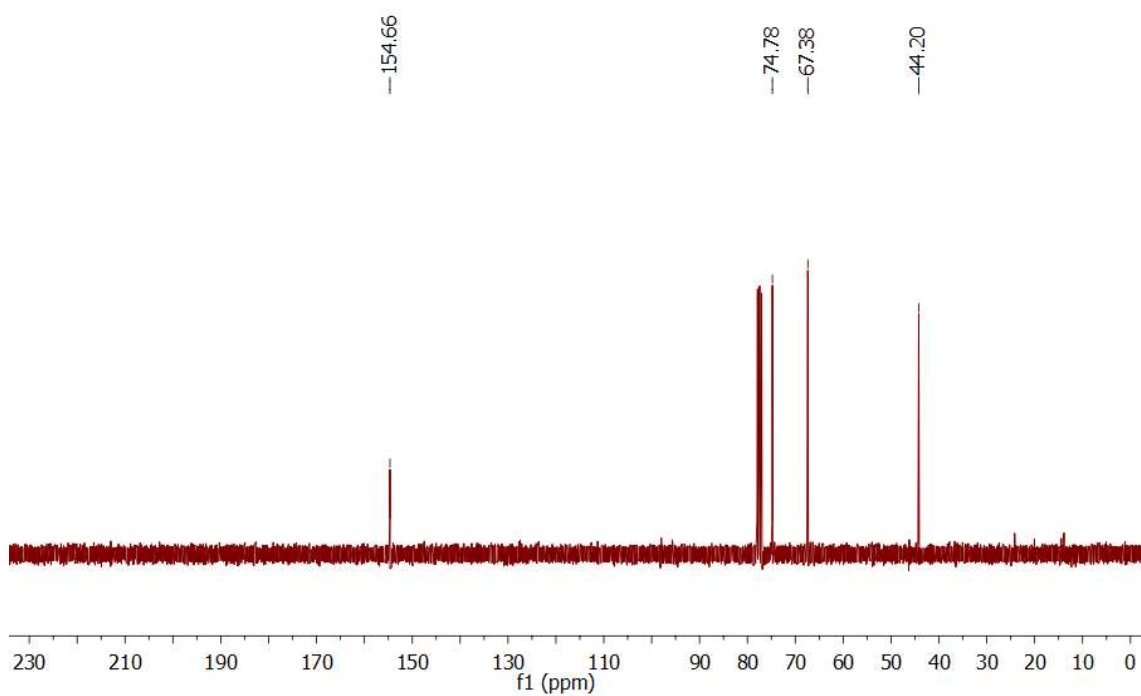

**Figure S13.** <sup>1</sup>H and <sup>13</sup>C NMR spectra of 4-(chloromethyl)-1,3-dioxolan-2-one in CDCl<sub>3</sub>.

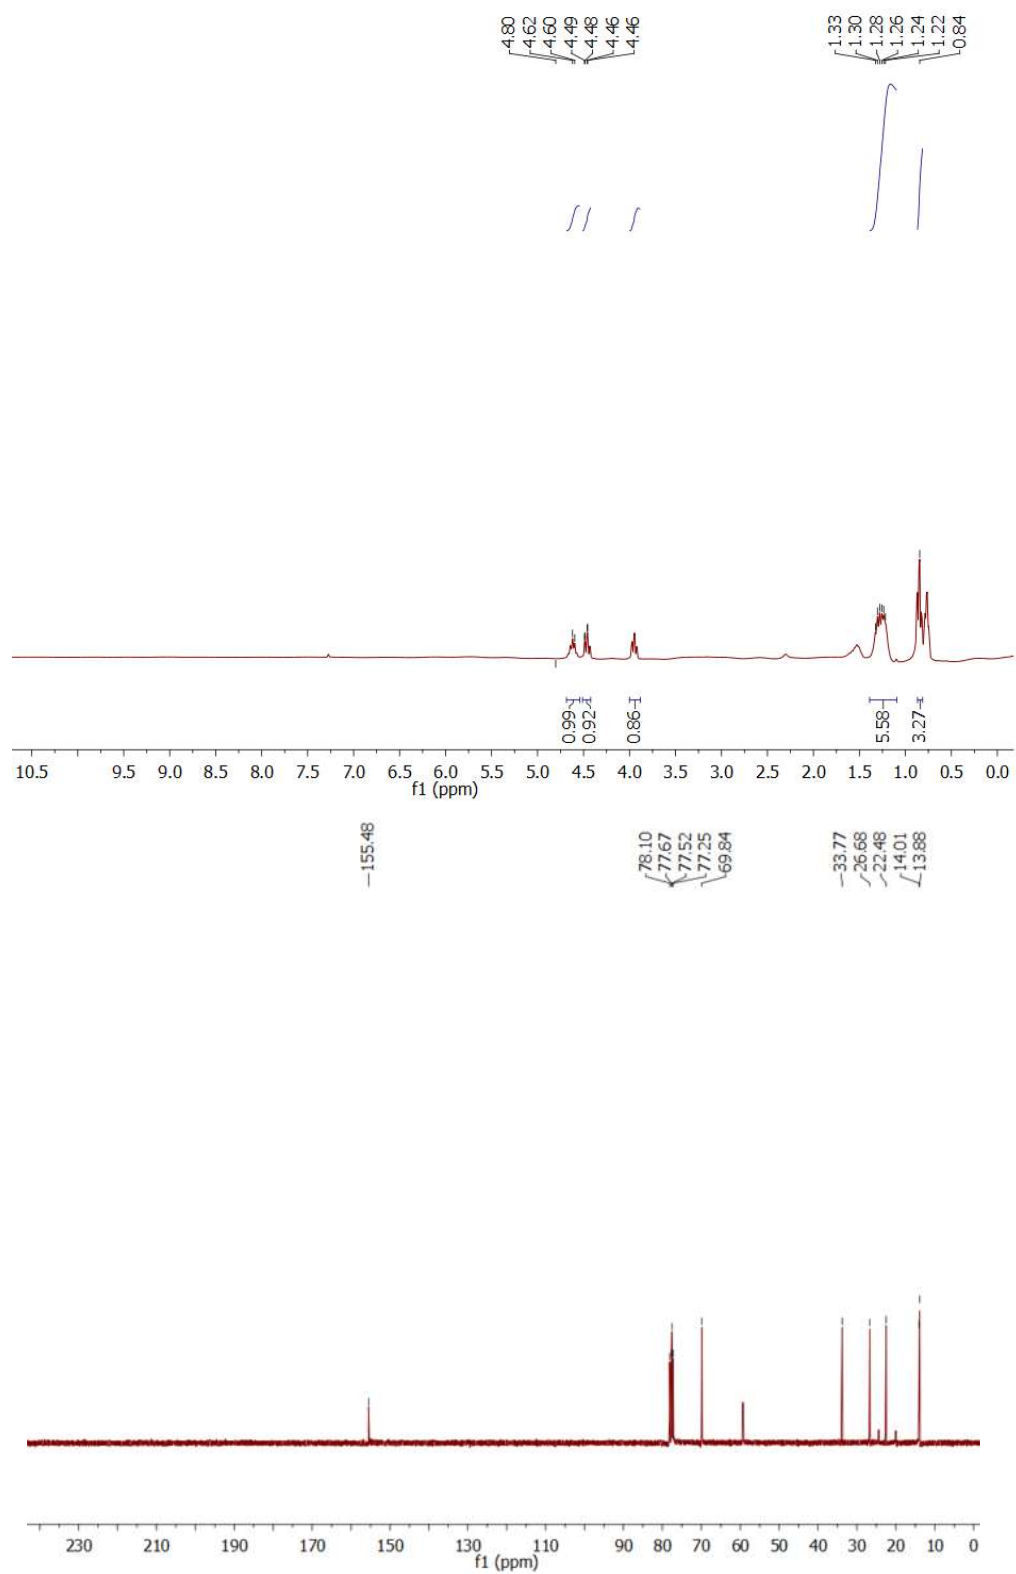

**Figure S14.** <sup>1</sup>H and <sup>13</sup>C NMR spectra of 4-butyl 1,3-dioxolan-2-one in CDCl<sub>3</sub>.

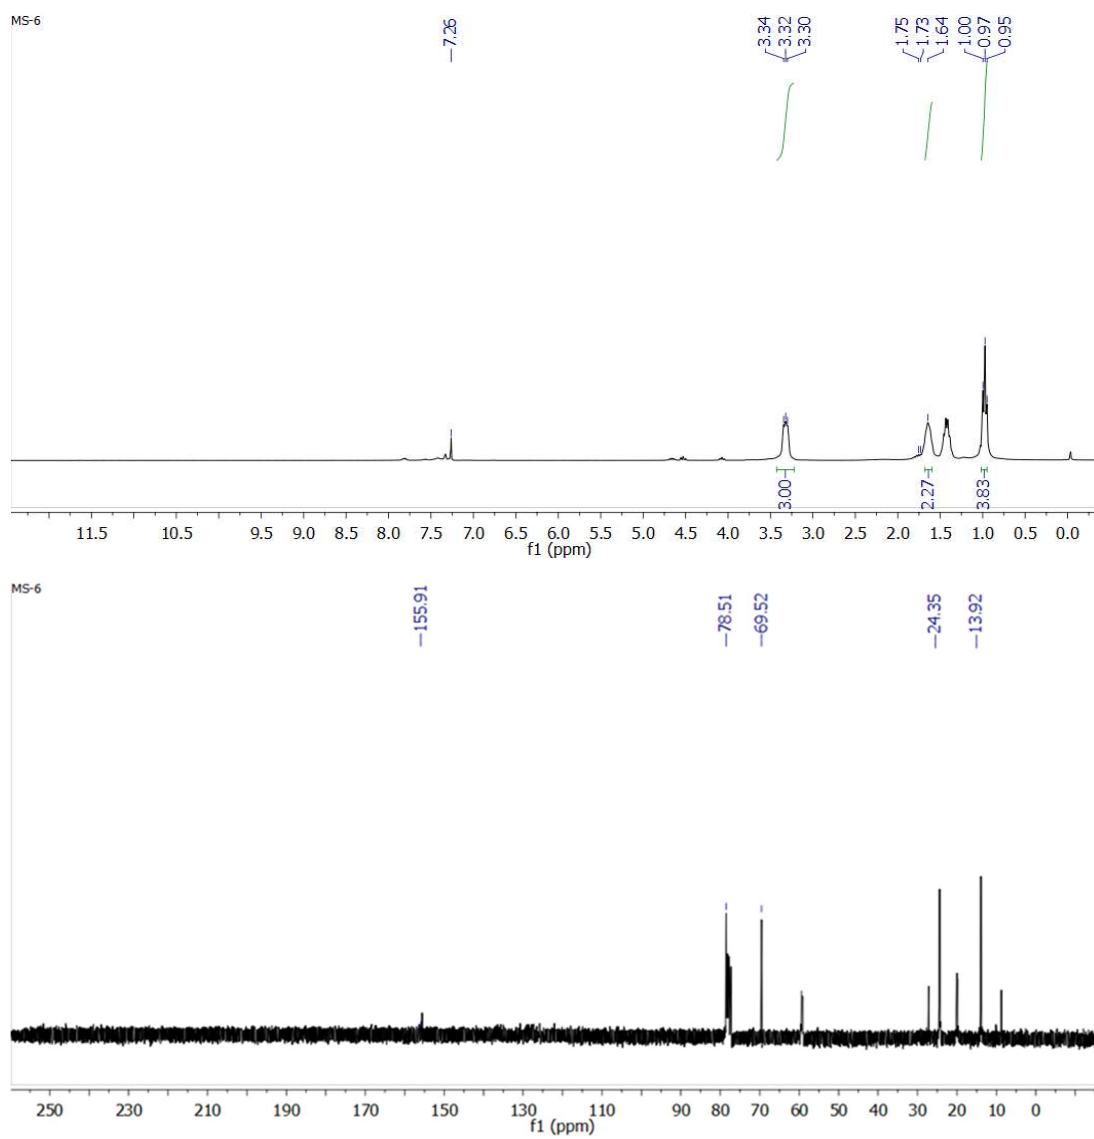

**Figure S15.**  $^1\text{H}$  and  $^{13}\text{C}$  NMR spectra of 4-ethyl-1,3-dioxolan-2-one.

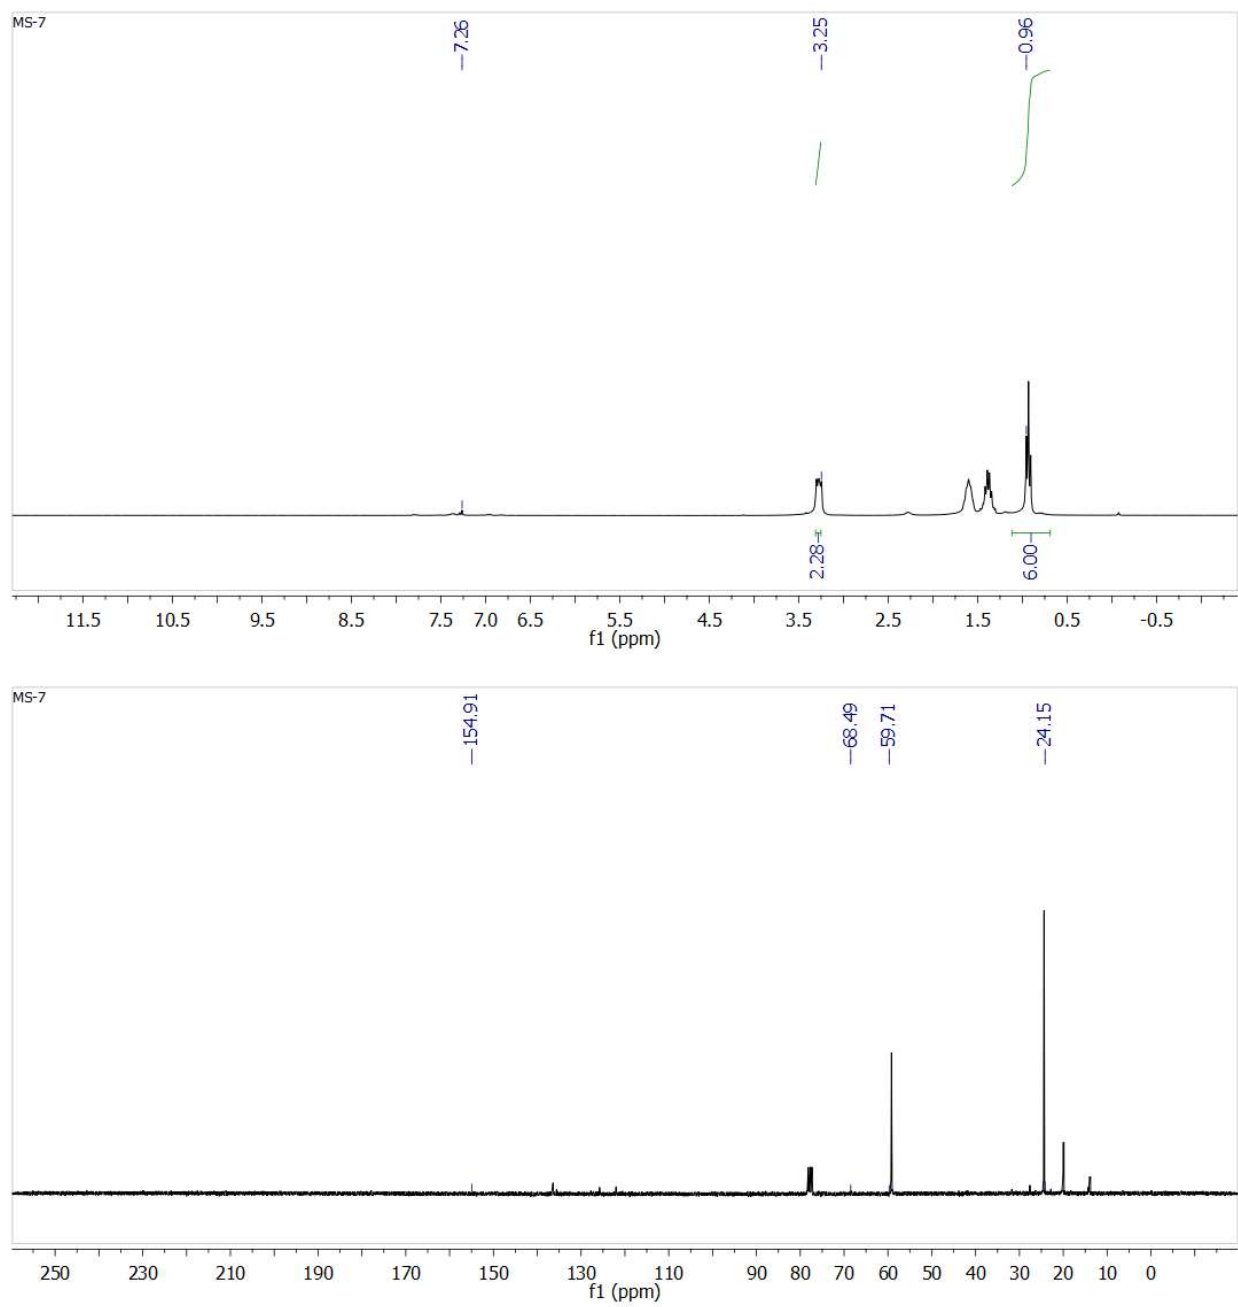

**Figure S16.** <sup>1</sup>H and <sup>13</sup>C NMR spectra of 4,4-dimethyl-1,3-dioxolan-2-one.

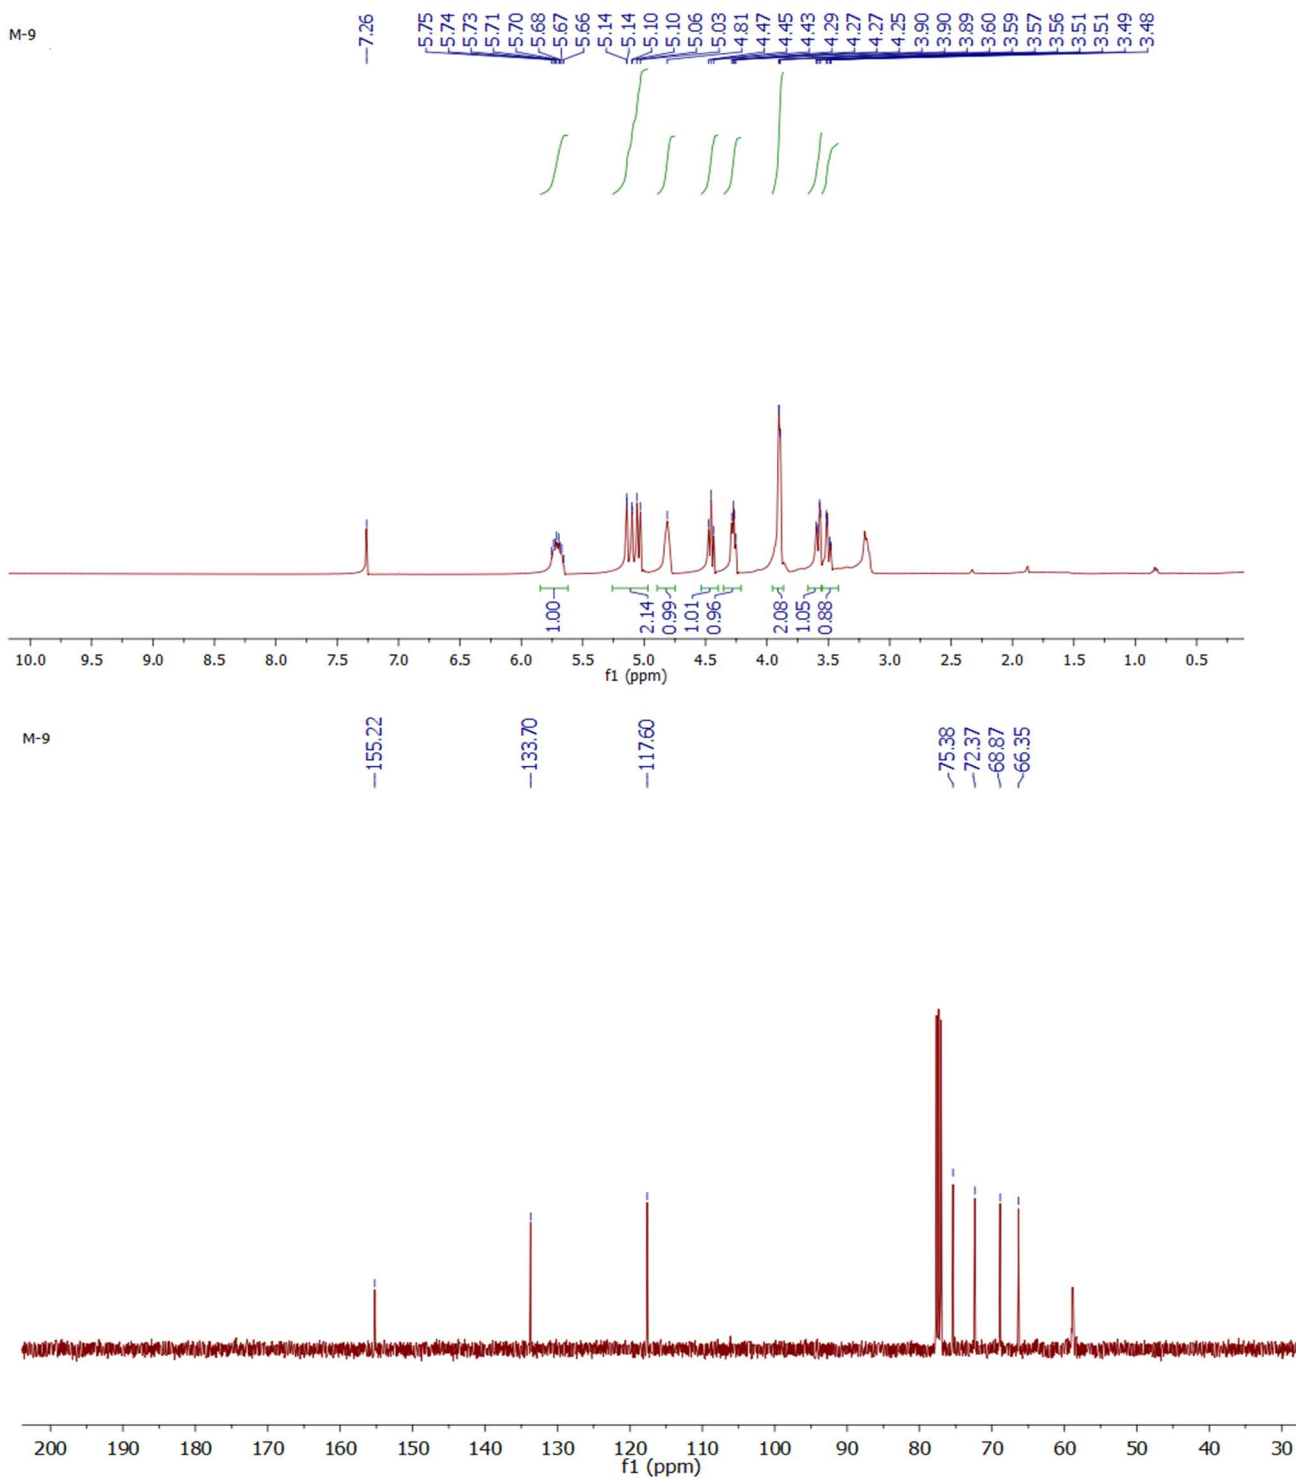

**Figure S17.**  $^1\text{H}$  and  $^{13}\text{C}$  NMR spectra of 4-(allyloxymethyl)-1,3-dioxolan-2-one.

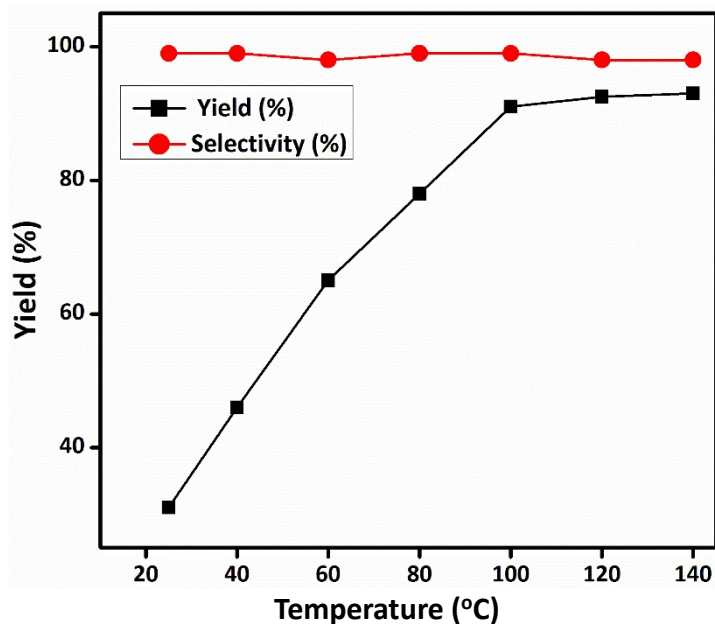

**Figure S18.** Temperature depended yield and selectivity of propylene carbonate production by **4** (2.5  $\mu\text{mol}$ , 0.05 mol%), propylene oxide (5 mmol),  $\text{Et}_3\text{N}$  (5  $\mu\text{mol}$ ) under 1 atm  $\text{CO}_2$  in  $\text{CH}_3\text{CN}$  (2 mL) for 8 hours with various temperature.

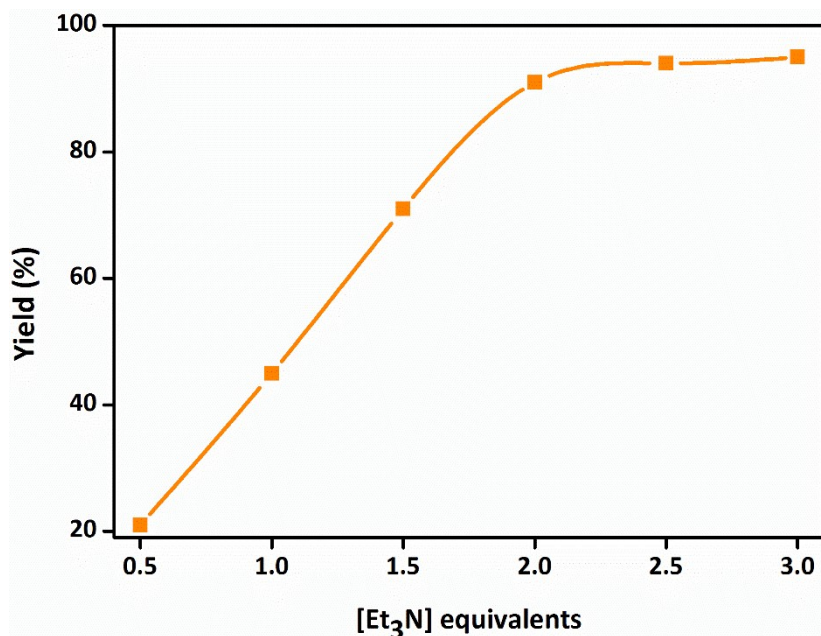

**Figure S19.** Influence of  $\text{Et}_3\text{N}$  for the  $\text{CO}_2$  fixation reaction. Reaction condition: propyleneoxide (5 mmol), **4** (2.5  $\mu\text{mol}$ , 0.05 mol%) and  $\text{Et}_3\text{N}$  (0.5 – 3 equivalents) in  $\text{CH}_3\text{CN}$  (2.0 mL) under 1 atm  $\text{CO}_2$  at 100 °C over 8 hours.

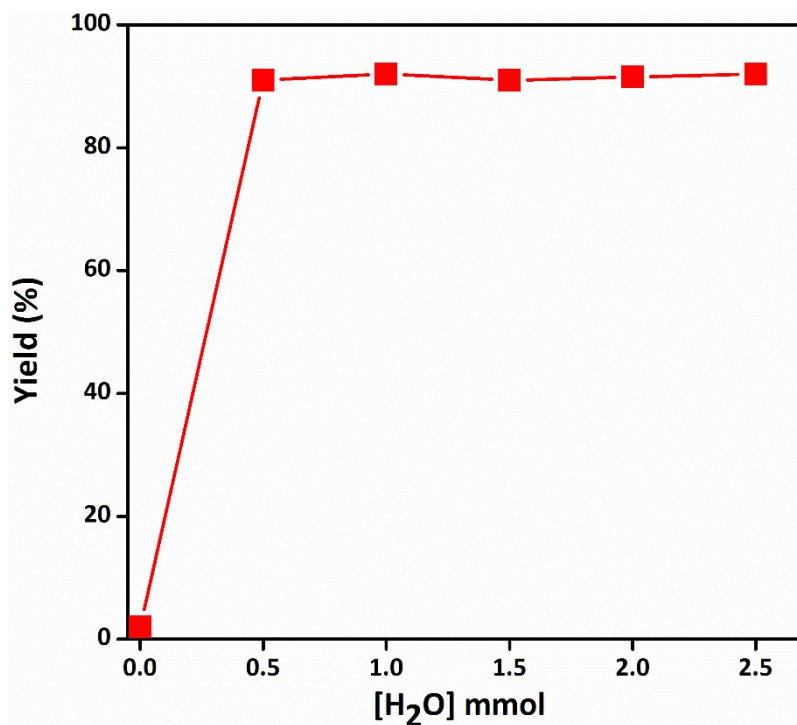

**Figure S20.** Influence of H<sub>2</sub>O in the CO<sub>2</sub> fixation reaction. Reaction condition: propyleneoxide (5 mmol), **4** (2.5  $\mu$ mol, 0.05 mol%) and Et<sub>3</sub>N (5  $\mu$ mol) in CH<sub>3</sub>CN (2.0 mL), H<sub>2</sub>O (0.5 – 2.5 mmol) under 1 atm CO<sub>2</sub> at 100 °C.

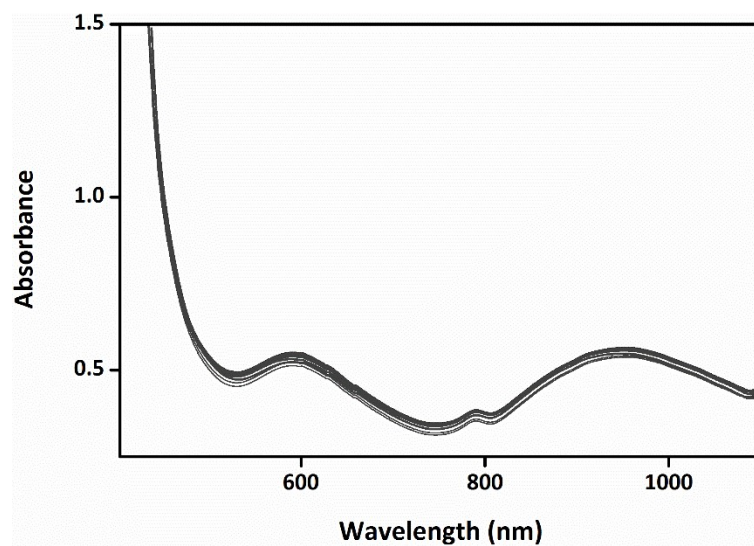

**Figure S21.** Electronic spectral change for the reaction of **4** ( $5 \times 10^{-3}$  M) with O<sub>2</sub> and CO<sub>2</sub> in acetonitrile at 25 °C.

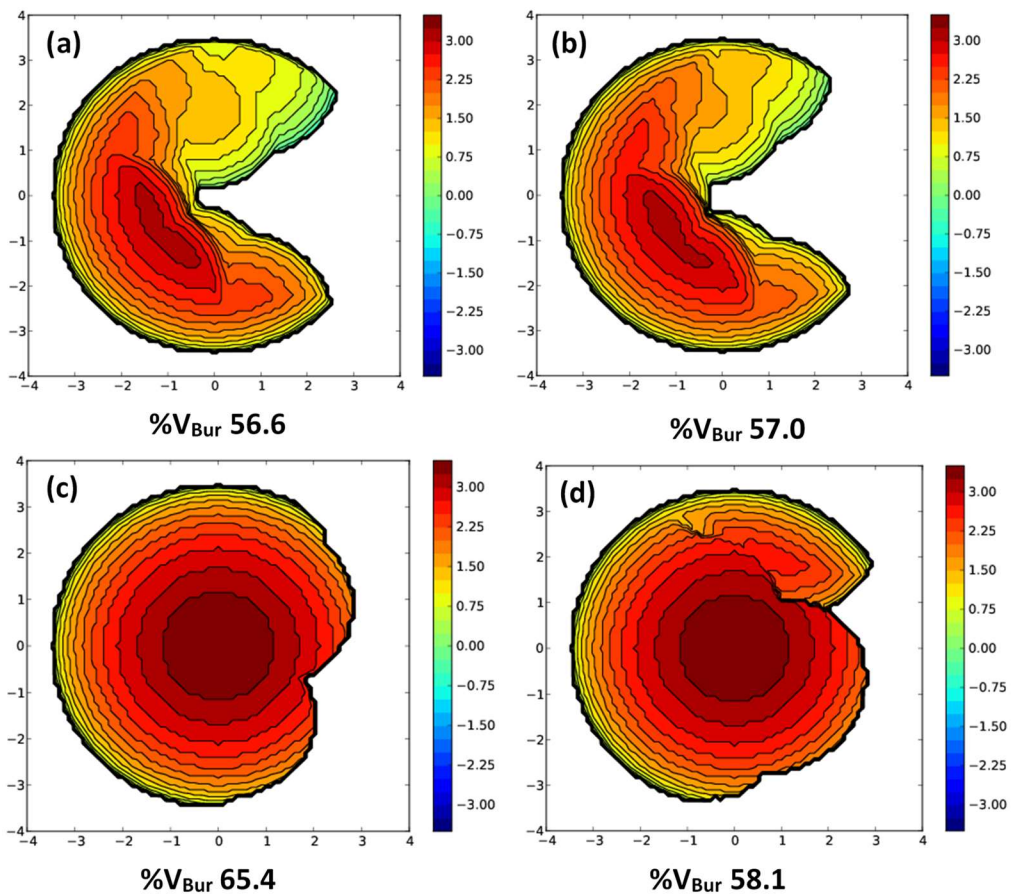

**Figure S22.** Steric map of complex 1 (a), 2 (b), 3 (c) and 4 (d) calculated by SambVca 2.1 A.



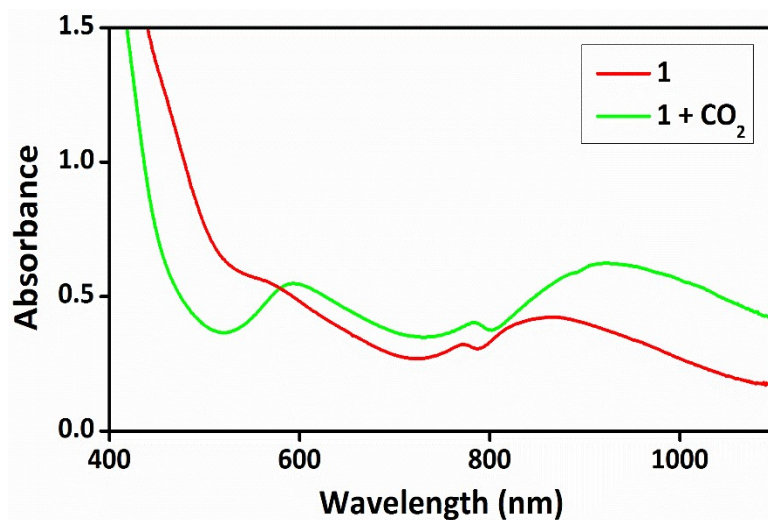

**Figure S23.** Electronic spectral change for the reaction of **1** ( $5 \times 10^{-3}$  M) with  $\text{CO}_2$  in acetonitrile at 25 °C.

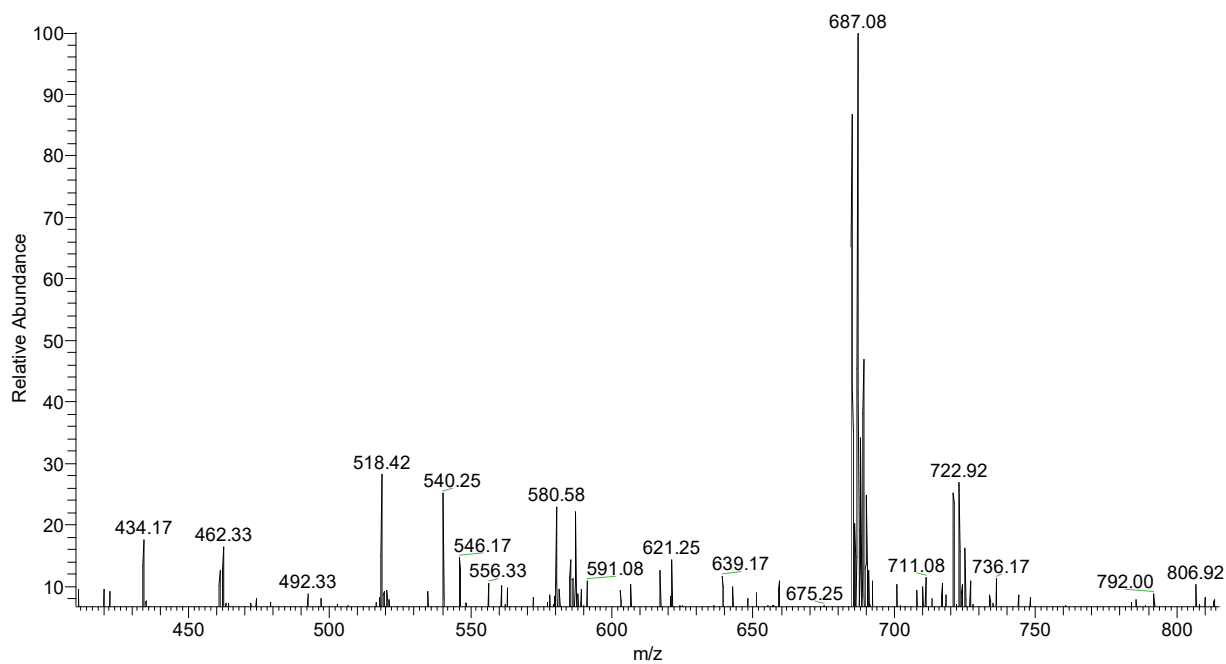

**Figure S24.** ESI-MS spectrum of **1a** in acetonitrile.

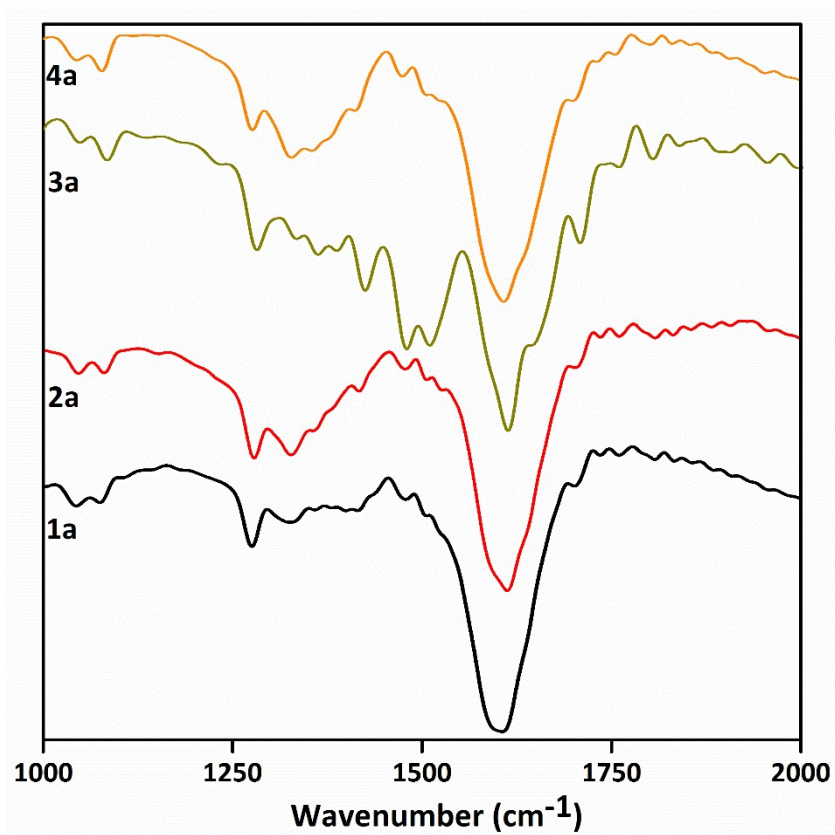

**Figure S25.** FT-IR spectra for **1a** – **4a** using KBr.

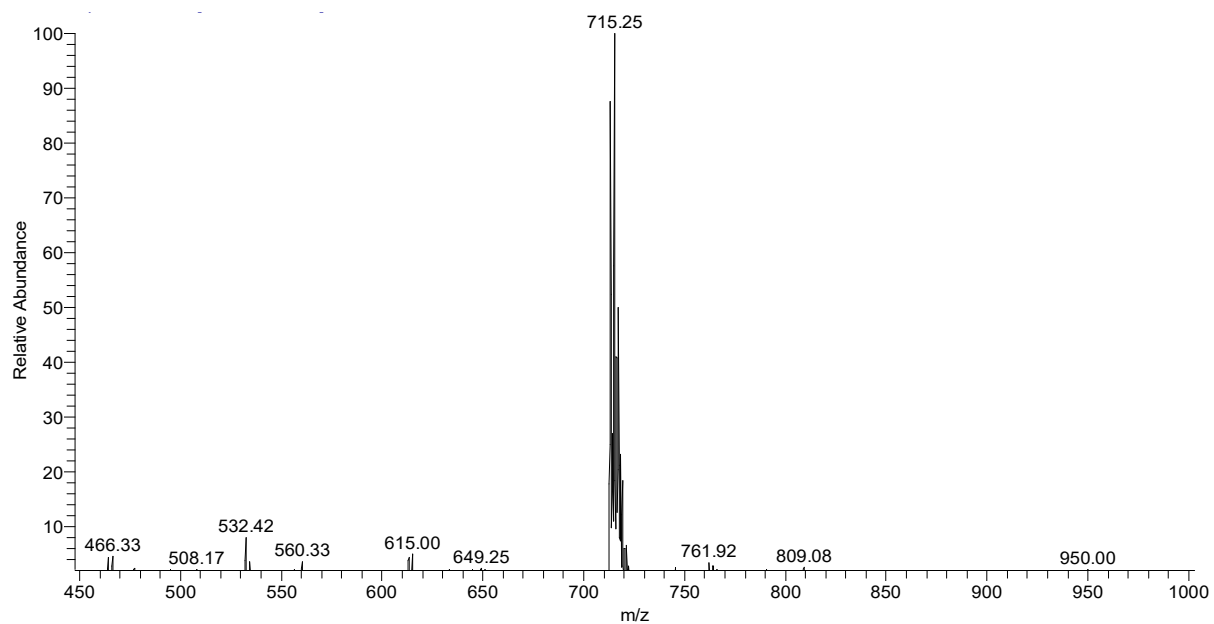

**Figure S26.** ESI-MS spectrum of **2a** in acetonitrile.

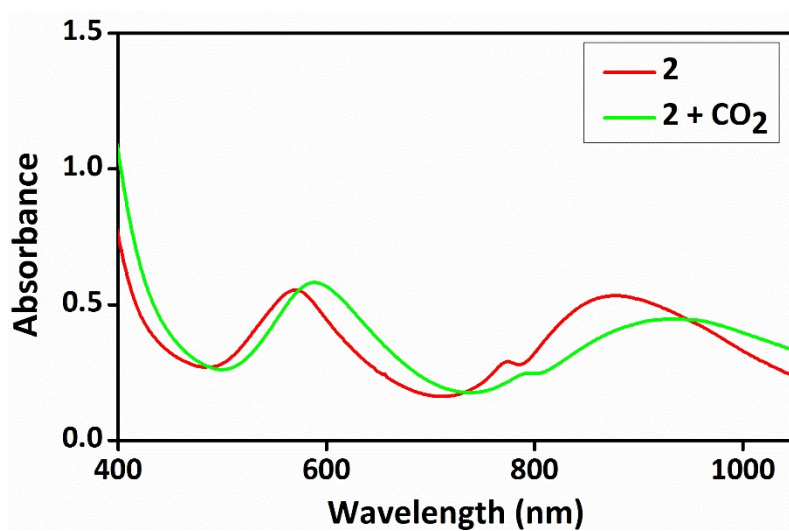

**Figure S27.** Electronic spectral change for the reaction of **2** ( $5 \times 10^{-3}$  M) with  $\text{CO}_2$  in acetonitrile at  $25^\circ\text{C}$ .

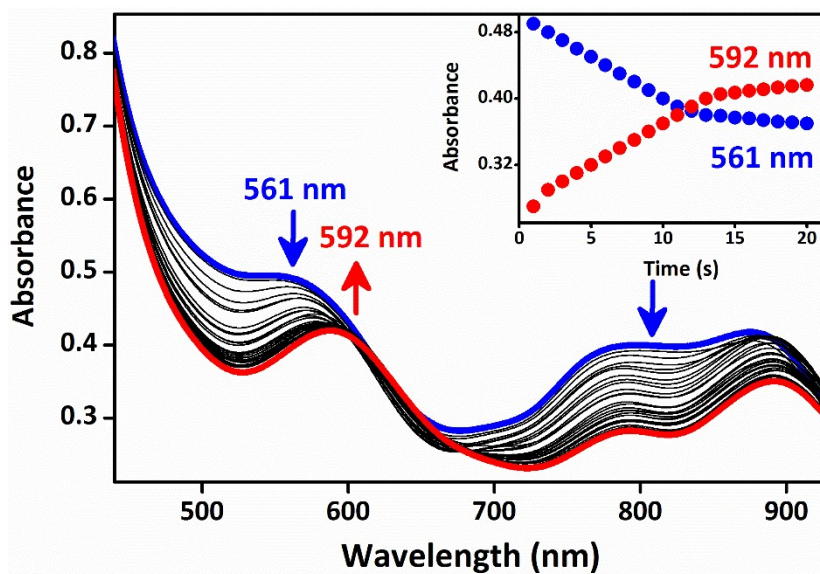

**Figure S28.** The kinetic behavior of the complex **2** ( $1 \times 10^{-3}$  M) with  $\text{CO}_2$  in the presence of two equivalent  $\text{Et}_3\text{N}$  in acetonitrile solution at  $25^\circ\text{C}$ . The inset shows the time course of the absorbance at 561 and 592 nm.

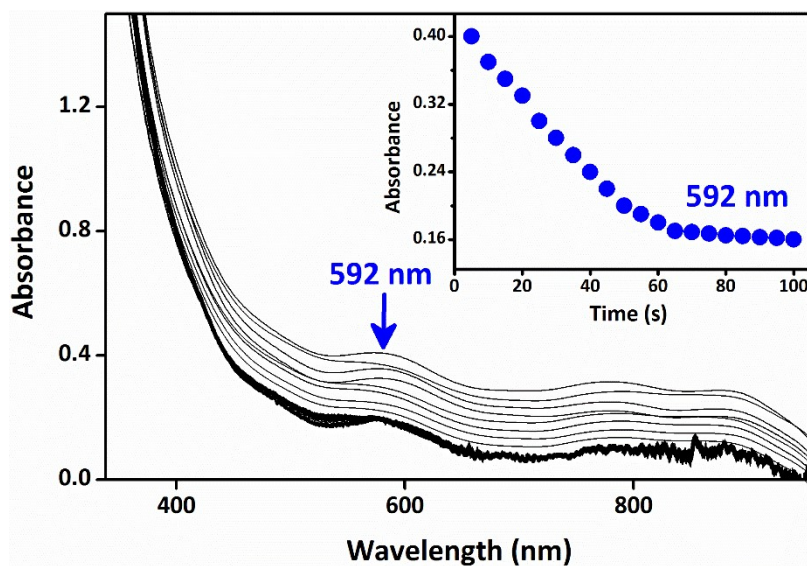

**Figure S29.** The reaction of  $[(\text{L}2\text{Ni})_2(\text{CO}_3)]^{2+}$  ( $1 \times 10^{-3}$  M) with 50 equivalents of epichlorohydrin in acetonitrile at  $70^\circ\text{C}$ . The inset shows the time course of the absorbance at 592 nm.

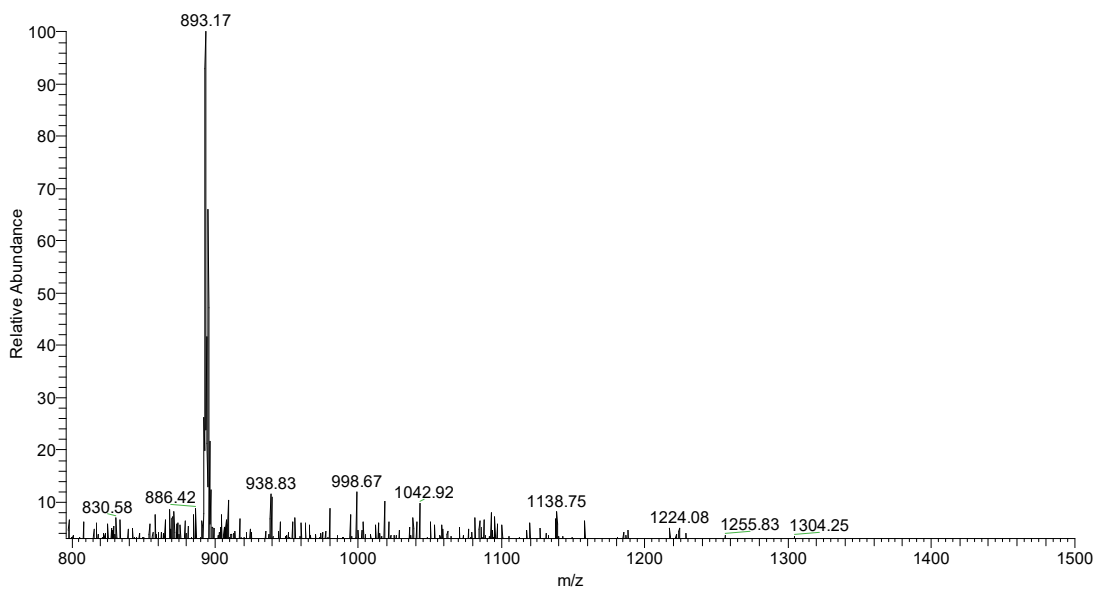

**Figure S30.** ESI-MS spectrum of **3a** in acetonitrile.

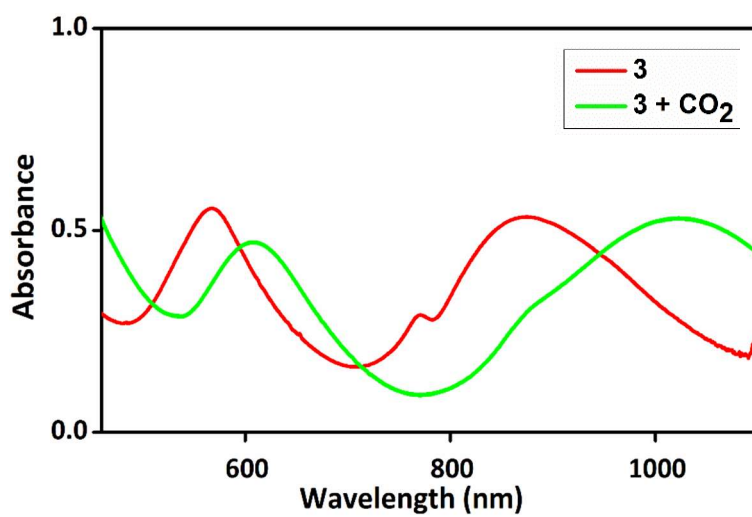

**Figure S31.** Electronic spectral change for the reaction of **3** ( $1 \times 10^{-3}$  M) with  $\text{CO}_2$  in acetonitrile at  $25^\circ\text{C}$ .

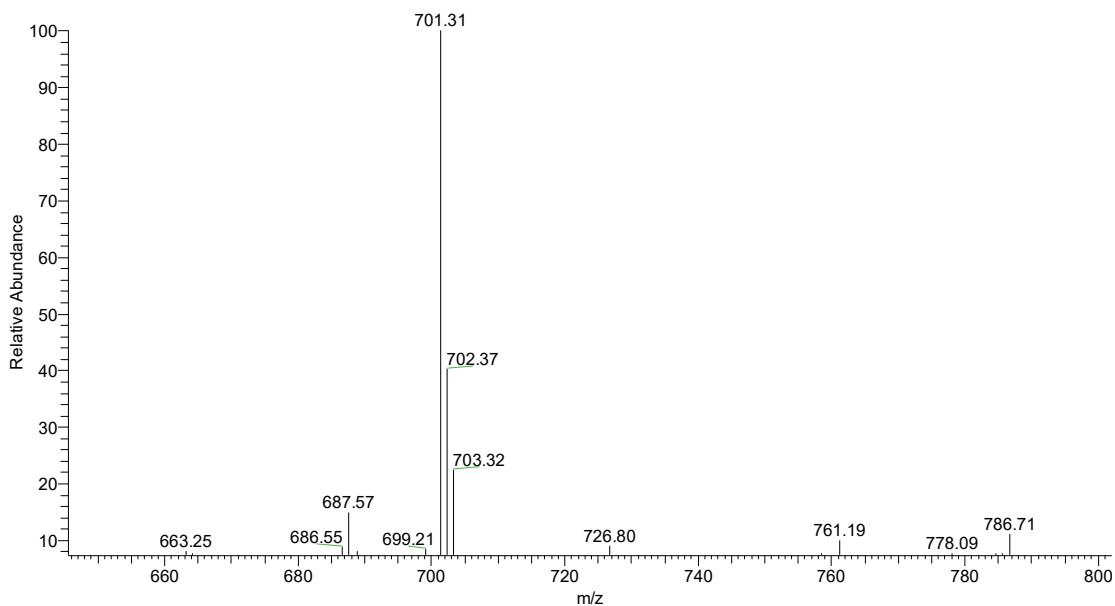

**Figure S32.** ESI-MS spectrum of **4a** in acetonitrile.

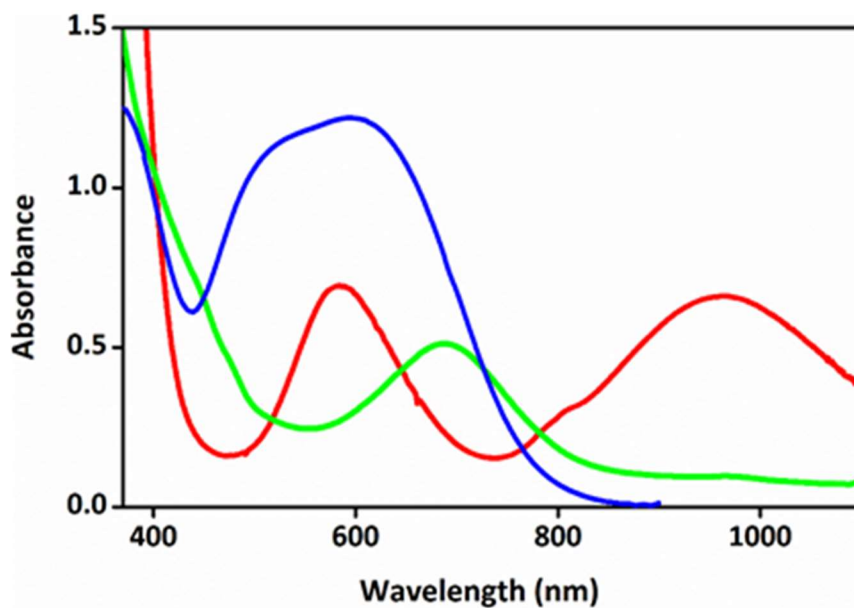

**Figure S33.** Absorption spectra of **4** (solid-state, blue), **4** ( $1 \times 10^{-3}$  M) (red) and **4a** ( $1 \times 10^{-3}$  M) in CH<sub>3</sub>CN (green) at 25 °C.

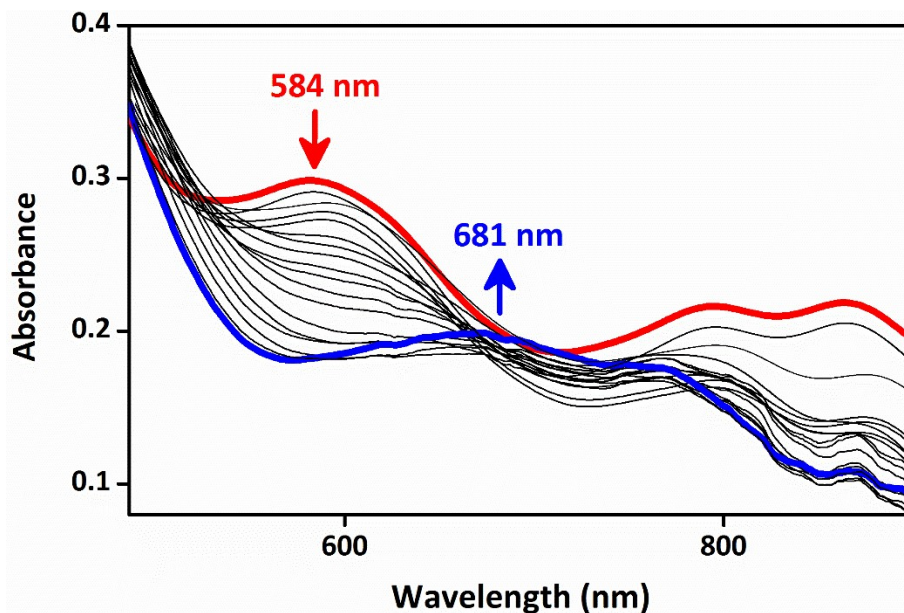

**Figure S34.** The kinetic behavior of the complex **4** ( $1 \times 10^{-3}$  M) with  $\text{CO}_2$  in the presence of two equivalent  $\text{Et}_3\text{N}$  in acetonitrile solution at  $25^\circ\text{C}$ . The inset shows the time course of the absorbance at 584 and 581 nm.

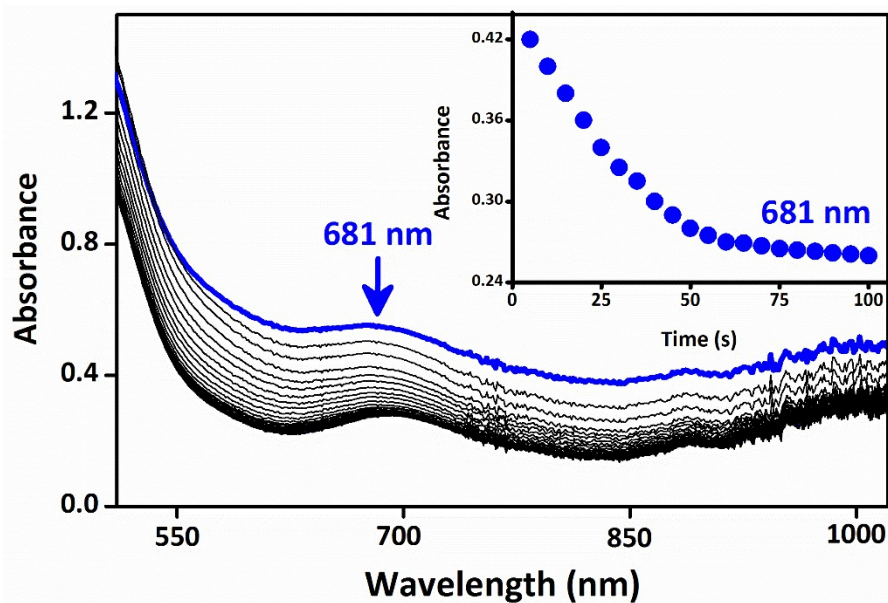

**Figure S35.** The reaction of  $[(\text{L4Ni})_2(\text{CO}_3)]^{2+}$  ( $1 \times 10^{-3}$  M) with 50 equivalents of epichlorohydrin in acetonitrile at  $70^\circ\text{C}$ . The inset shows the time course of the absorbance at 681 nm.

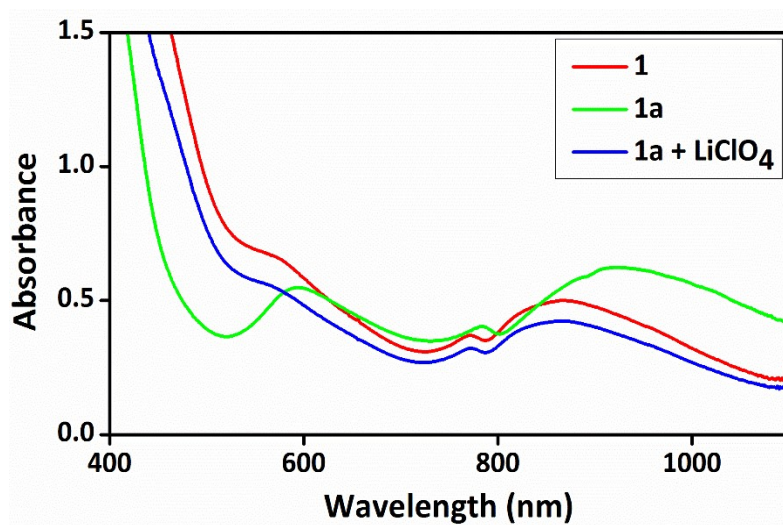

**Figure S36.** Electronic spectral change of complex **1**, **1a** and **1a** + LiClO<sub>4</sub> in acetonitrile at room temperature.

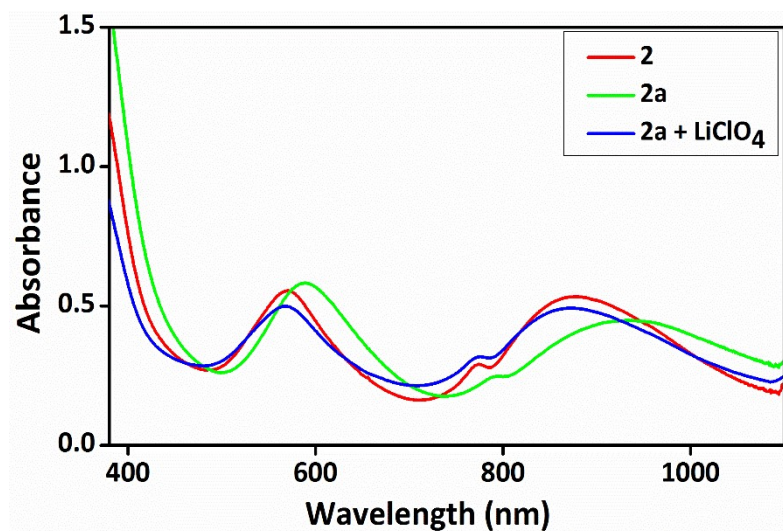

**Figure S37.** Electronic spectral change of complex **2**, **2a** and **2a** + LiClO<sub>4</sub> in acetonitrile at room temperature.



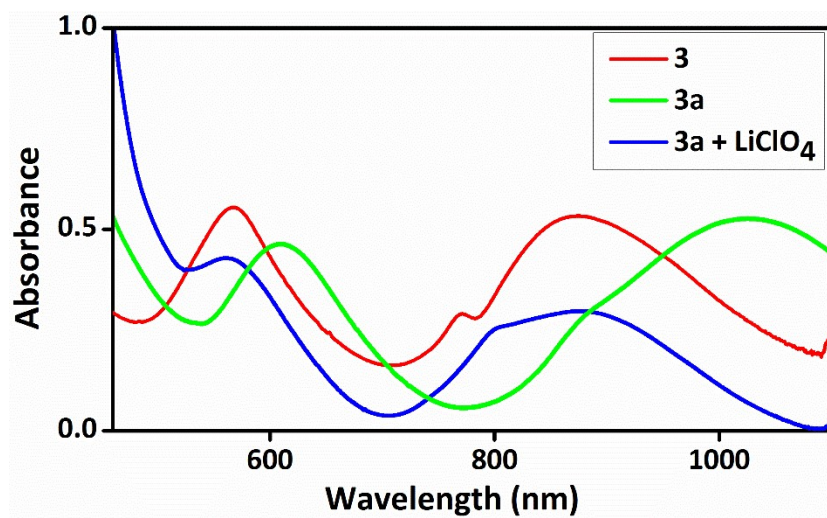

**Figure S38.** Electronic spectral change of complex **3**, **3a** and **3a + LiClO<sub>4</sub>** in acetonitrile at room temperature.

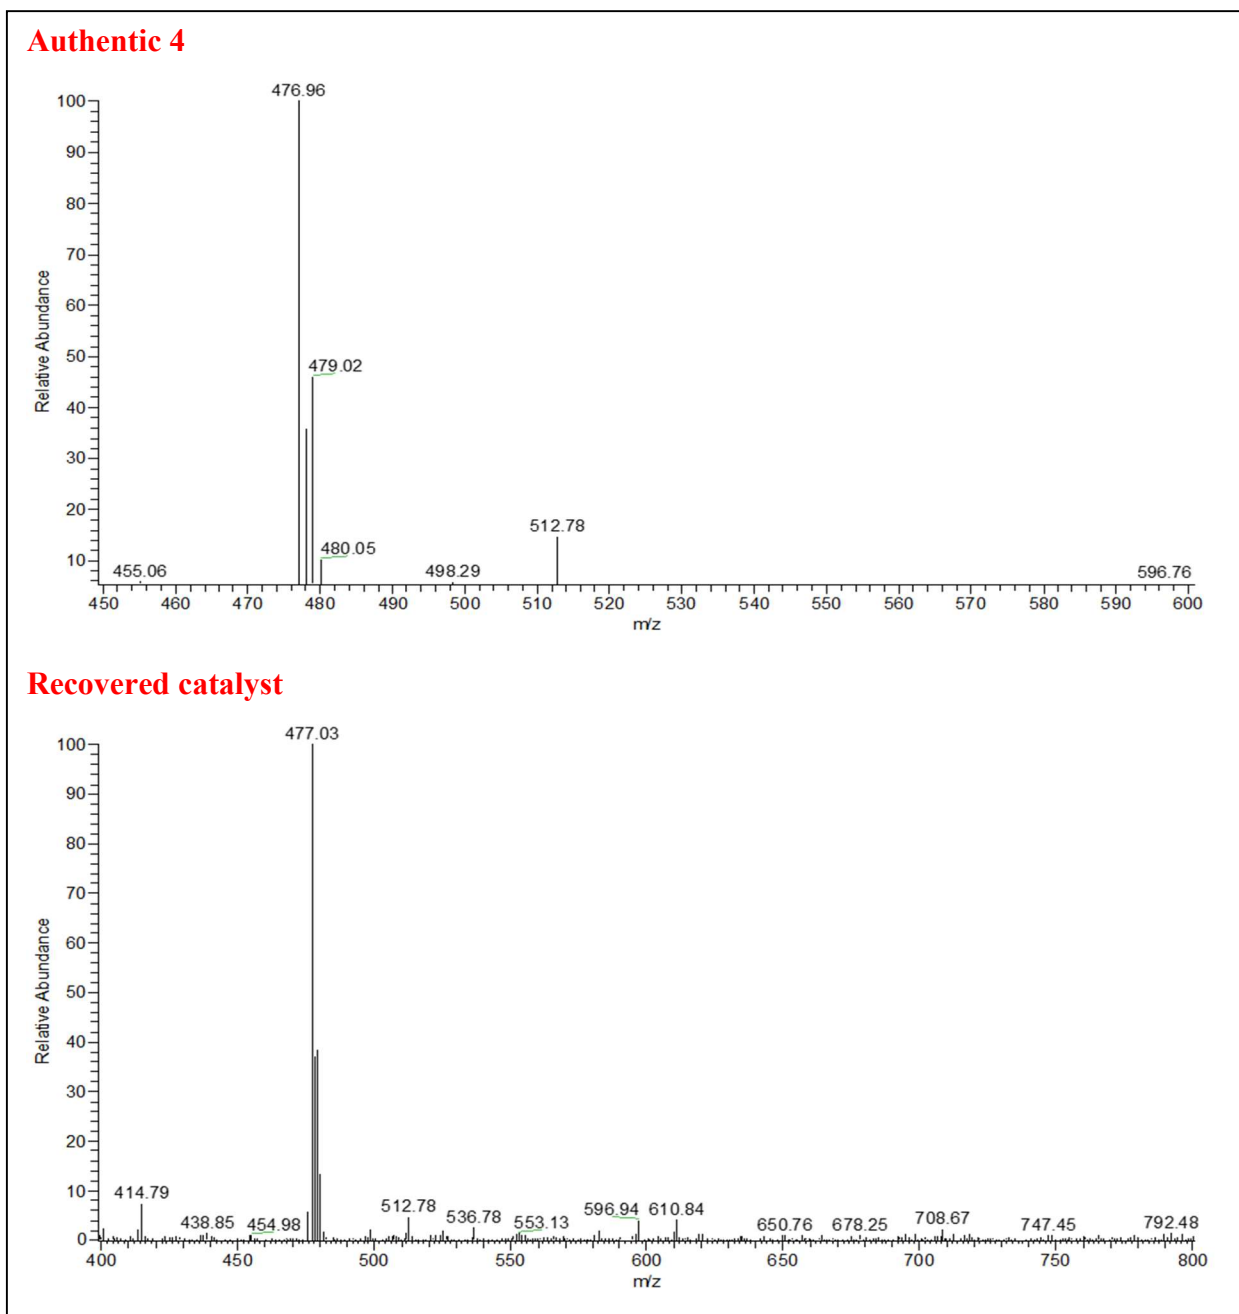

**Figure S39.** ESI-MS spectra of **4** (top) and regeneration of the catalyst **4** (bottom) in acetonitrile solution.

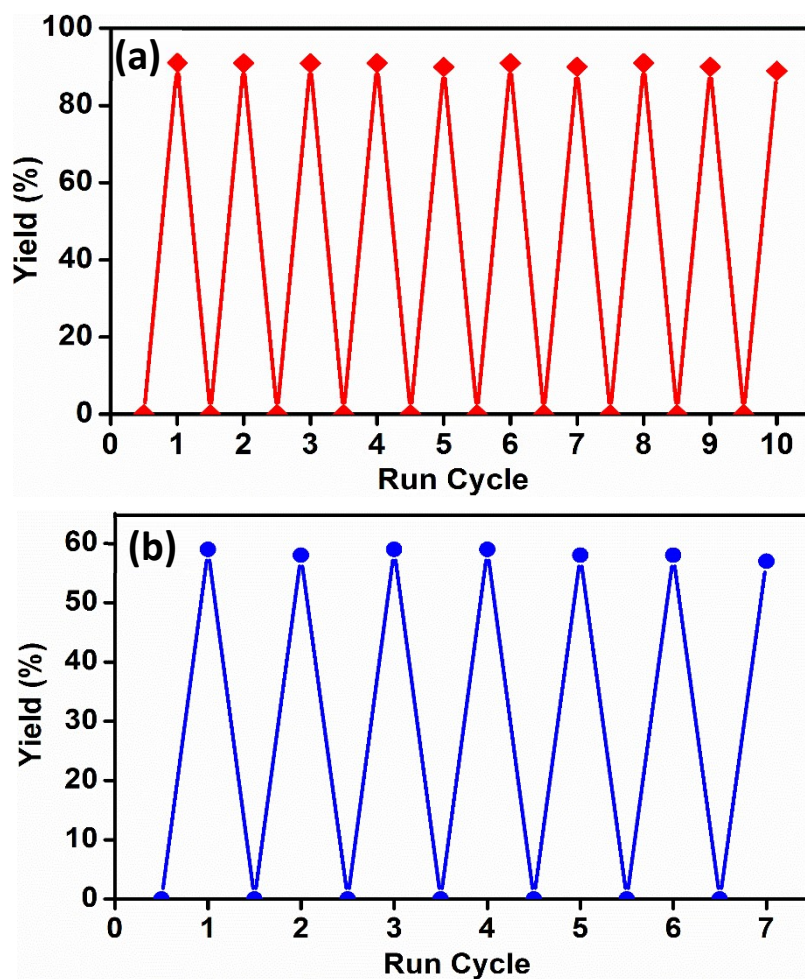

**Figure S40.** Recyclability test for 4 in the presence of CO<sub>2</sub> (a) and atmospheric air (b).

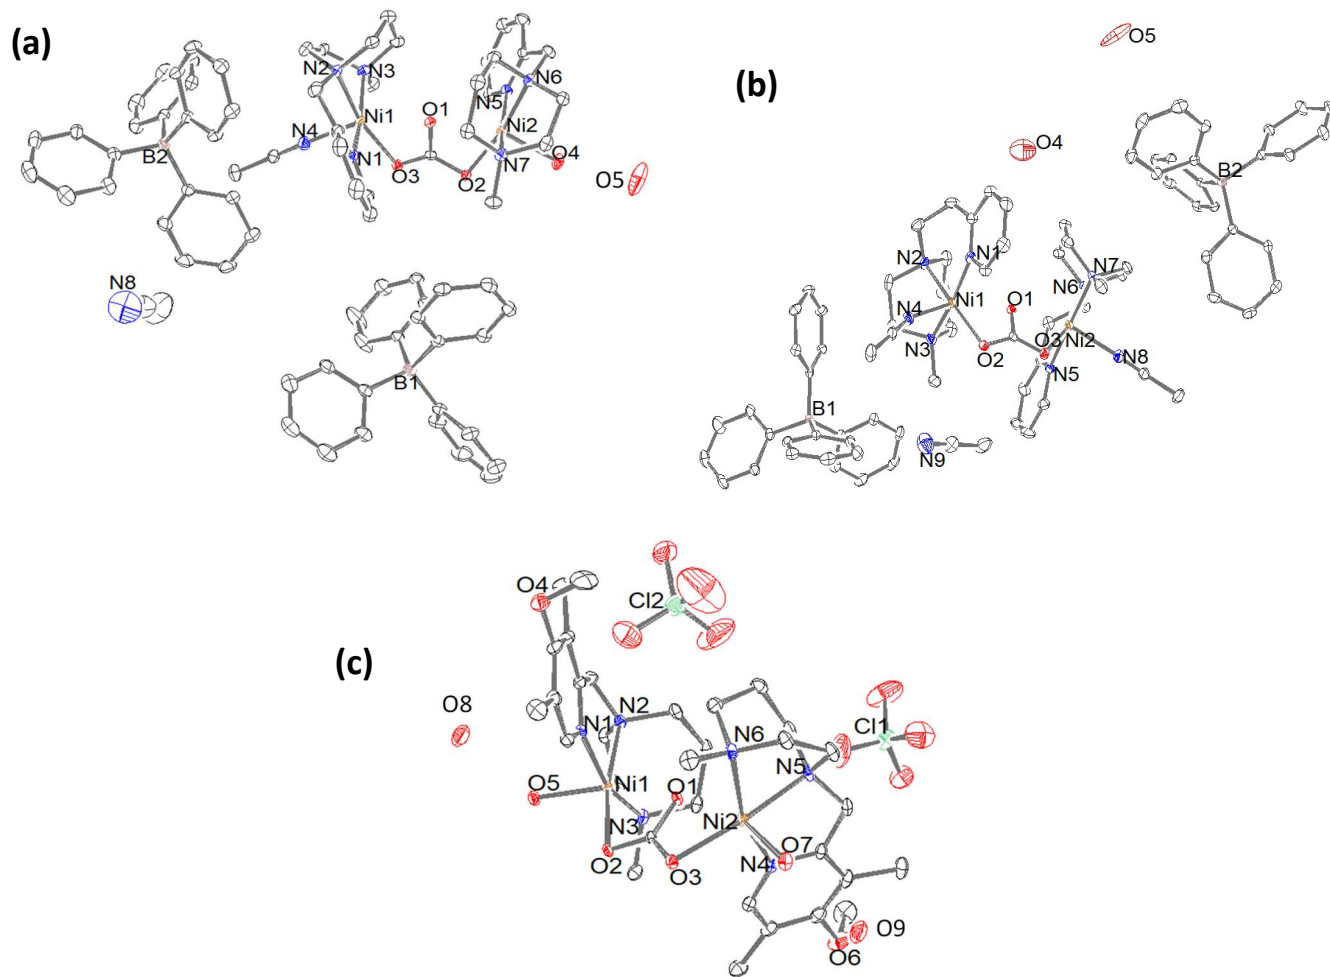

**Figure S41.** ORTEP plot for **1a** (a), **2a** (b) and **4a** (c). The probability ellipsoids are drawn at the 50% probability level. The H atoms are omitted for the clarity.

**Table S1.** Selected bond distances<sup>a</sup> (Å) bond angles<sup>a</sup> (°) of **1**

| Bond lengths |          | Bond angles     |            |
|--------------|----------|-----------------|------------|
| Ni(1)-N(1)   | 1.985(3) | N(1)-Ni(1)-N(3) | 158.1(12)  |
| Ni(1)-N(2)   | 2.152(3) | N(1)-Ni(1)-N(6) | 93.8(12)   |
| Ni(1)-N(3)   | 2.085(3) | N(1)-Ni(1)-N(2) | 86.0(11)   |
| Ni(1)-N(4)   | 2.175(3) | N(1)-Ni(1)-N(5) | 95.1(13)   |
| Ni(1)-N(5)   | 2.153(3) | N(1)-Ni(1)-N(4) | 80.4(13)   |
| Ni(1)-N(6)   | 2.120(3) | N(3)-Ni(1)-N(6) | 88.42(13)  |
|              |          | N(3)-Ni(1)-N(2) | 72.25(12)  |
|              |          | N(3)-Ni(1)-N(5) | 106.73(12) |
|              |          | N(3)-Ni(1)-N(4) | 100.21(12) |
|              |          | N(6)-Ni(1)-N(2) | 88.27(13)  |
|              |          | N(6)-Ni(1)-N(5) | 88.74(12)  |
|              |          | N(6)-Ni(1)-N(4) | 169.13(13) |
|              |          | N(2)-Ni(1)-N(4) | 100.51(12) |
|              |          | N(5)-Ni(1)-N(4) | 82.6(13)   |

<sup>a</sup>Standard deviations in parenthesis

**Table S2.** Calculated bond distance and bond angle for **2 - 4** by DFT method

|                    | <b>2</b> | <b>3</b> | <b>4</b> |
|--------------------|----------|----------|----------|
| <b>Bond length</b> |          |          |          |
| Ni(1)-N(1)         | 2.139    | 2.125    | 2.061    |
| Ni(1)-N(2)         | 2.204    | 2.208    | 2.132    |
| Ni(1)-N(3)         | 2.143    | 2.150    | 2.148    |
| Ni(1)-N(4)         | 2.130    | 2.136    | 2.123    |
| Ni(1)-N(5)         | 2.066    | 2.137    | 2.161    |
| Ni(1)-N(6)         | 2.351    | 2.252    | 2.141    |
| <b>Bond Angle</b>  |          |          |          |
| N(1)-Ni(1)-N(3)    | 160.63   | 156.58   | 159.07   |
| N(1)-Ni(1)-N(6)    | 94.56    | 83.54    | 86.17    |
| N(1)-Ni(1)-N(2)    | 83.48    | 81.02    | 82.24    |
| N(1)-Ni(1)-N(5)    | 84.46    | 91.45    | 100.60   |
| N(1)-Ni(1)-N(4)    | 85.64    | 83.26    | 88.98    |
| N(3)-Ni(1)-N(6)    | 98.57    | 91.84    | 95.68    |
| N(3)-Ni(1)-N(2)    | 76.40    | 74.65    | 76.98    |
| N(3)-Ni(1)-N(5)    | 115.54   | 105.82   | 93.79    |
| N(3)-Ni(1)-N(4)    | 79.121   | 85.69    | 100.31   |
| N(6)-Ni(1)-N(2)    | 103.33   | 79.65    | 102.08   |
| N(6)-Ni(1)-N(5)    | 163.45   | 157.81   | 165.28   |
| N(6)-Ni(1)-N(4)    | 75.14    | 86.32    | 83.365   |
| N(2)-Ni(1)-N(4)    | 167.33   | 172.32   | 174.069  |
| N(5)-Ni(1)-N(4)    | 81.22    | 80.35    | 83.88    |

**Table S3.** The electronic spectral, redox data of the nickel(II) complexes and their CO<sub>2</sub> adducts

| Complex   | Electronic Spectra <sup>a</sup><br>$\lambda_{\text{max}}$ , nm, ( $\epsilon$ , M <sup>-1</sup> cm <sup>-1</sup> ) | Redox data <sup>c</sup> |                        |                    |               |        |
|-----------|-------------------------------------------------------------------------------------------------------------------|-------------------------|------------------------|--------------------|---------------|--------|
|           |                                                                                                                   | $E_{\text{pa}}$<br>(V)  | $E_{\text{pc}}$<br>(V) | $\Delta E$<br>(mV) | $E_{1/2}$ (V) |        |
|           |                                                                                                                   |                         |                        |                    | CV            | DPV    |
| <b>1</b>  | 542 (351), 769 (270), 845 (348). 610 <sup>b</sup>                                                                 | -0.515                  | -0.771                 | 256                | -0.643        | -0.621 |
| <b>1a</b> | 596 (273), 794 (183), 896 (291)                                                                                   | -0.590                  | -0.831                 | 241                | -0.710        |        |
| <b>2</b>  | 561 (491), 776 (390), 883 (417). 640 <sup>b</sup>                                                                 | -0.551                  | -0.820                 | 269                | -0.685        | -0.646 |
| <b>2a</b> | 592 (501), 794 (247), 927 (447)                                                                                   | -0.643                  | -0.869                 | 226                | -0.756        |        |
| <b>3</b>  | 569 (554), 770 (290), 874 (533). 520 <sup>b</sup>                                                                 | -0.432                  | -0.663                 | 231                | -0.547        | -0.592 |
| <b>3a</b> | 608 (520), 800 (308), 1010 (560)                                                                                  | -0.605                  | -0.820                 | 215                | -0.712        |        |
| <b>4</b>  | 584 (291), 791 (210), 864 (218). 580 <sup>b</sup>                                                                 | -0.614                  | -0.793                 | 190                | -0.703        | -0.691 |
| <b>4a</b> | 681 (205), 794 (156), 872 (120)                                                                                   | -0.669                  | -0.879                 | 210                | -0.774        |        |

<sup>a</sup>Concentration:  $1 \times 10^{-3}$  M in acetonitrile. <sup>b</sup>In diffuse reflectance. <sup>c</sup>Concentration:  $1 \times 10^{-3}$  M in acetonitrile; supporting electrolyte: 0.1 M TBAP. Working electrode: Pt sphere, reference electrode: Ag/Ag<sup>+</sup> and counter electrode: Pt wire.

**Table S4.** Optimization of the reaction of propylene oxide with 1 atm CO<sub>2</sub> using **4**

| Entry <sup>a</sup> | Catalyst<br>(mol%) | Temperature<br>(°C) | Yield <sup>d</sup><br>(%) | TON  | TOF<br>(h <sup>-1</sup> ) | Selectivity<br>(%) |
|--------------------|--------------------|---------------------|---------------------------|------|---------------------------|--------------------|
| 1                  | 0.025              | 25                  | 16                        | 320  | 40                        | >99                |
| 2                  | 0.05               | 25                  | 31                        | 620  | 78                        | >99                |
| 3                  | 0.05               | 40                  | 42                        | 840  | 105                       | >99                |
| 4                  | 0.05               | 60                  | 65                        | 1300 | 163                       | >99                |
| 5                  | 0.05               | 80                  | 78                        | 1560 | 195                       | >99                |
| 6                  | 0.05               | 100                 | 91                        | 1820 | 228                       | >99                |
| 7                  | 0.05               | 120                 | 93                        | 1860 | 233                       | >99                |
| 8                  | -                  | 100                 | 4                         | 80   | 10                        | >99                |
| 9 <sup>b</sup>     | 0.05               | 100                 | 6                         | 120  | 15                        | -                  |
| 10 <sup>c</sup>    | 0.05               | 100                 | 78                        | 1560 | 195                       | >99                |
| 11 <sup>d</sup>    | 0.05               | 100                 | 82                        | 1640 | 205                       | >99                |
| 12 <sup>e</sup>    | 0.05               | 100                 | 64                        | 1280 | 160                       | >99                |

<sup>a</sup>Propylene oxide (5 mmol). <sup>b</sup>Absence of Et<sub>3</sub>N. <sup>c</sup>using catalyst **1**. <sup>d</sup>using catalyst **2**. <sup>e</sup>using catalyst **3**.



**Table S5.** Selected bond distances<sup>a</sup> (Å) bond angles<sup>a</sup> (°) for **1a** and **2a**.

| [(L1Ni) <sub>2</sub> (μ-CO <sub>3</sub> )(H <sub>2</sub> O)(CH <sub>3</sub> CN)](CH <sub>3</sub> CN)(BPh <sub>4</sub> ) <sub>2</sub> <b>1a</b>           |            |                 |            |                 |          |
|----------------------------------------------------------------------------------------------------------------------------------------------------------|------------|-----------------|------------|-----------------|----------|
| Bond Distance                                                                                                                                            |            |                 |            |                 |          |
| Ni(1)-N(1)                                                                                                                                               | 2.056      | Ni(2)-N(6)      | 2.067      | Ni(1)-N(2)      | 2.072    |
| Ni(2)-N(7)                                                                                                                                               | 2.099      | Ni(1)-N(3)      | 2.099      | Ni(1)-O(1)      | 2.057    |
| Ni(1)-N(4)                                                                                                                                               | 2.075      | Ni(2)-O(2)      | 2.044      | Ni(2)-N(5)      | 2.071    |
| Ni(2)-O(4)                                                                                                                                               | 2.100      |                 |            |                 |          |
| Bond Angle                                                                                                                                               |            |                 |            |                 |          |
| N(1)-Ni(1)-N(3)                                                                                                                                          | 160.6      | O(4)-Ni(2)-O(2) | 93.5       | N(1)-Ni(1)-N(4) | 92.8     |
| N(5)-Ni(2)-O(4)                                                                                                                                          | 93.1       | N(1)-Ni(1)-N(2) | 83.1       | N(7)-Ni(2)-O(4) | 93.5     |
| N(1)-Ni(1)-O(3)                                                                                                                                          | 95.7       | N(6)-Ni(2)-O(2) | 170.0      | N(2)-Ni(1)-O(3) | 165.8    |
| N(5)-Ni(2)-O(2)                                                                                                                                          | 94.2       | N(3)-Ni(1)-O(3) | 101.7      | N(7)-Ni(2)-O(2) | 103.8    |
| N(4)-Ni(1)-O(3)                                                                                                                                          | 96.0       | N(6)-Ni(2)-N(5) | 83.1       | N(2)-Ni(1)-N(3) | 77.8     |
| N(6)-Ni(2)-N(7)                                                                                                                                          | 77.7       | N(4)-Ni(1)-N(3) | 93.5       | N(5)-Ni(2)-N(7) | 160.2    |
| N(6)-Ni(2)-O(4)                                                                                                                                          | 96.1       |                 |            |                 |          |
|                                                                                                                                                          |            |                 |            |                 |          |
| [(L2Ni) <sub>2</sub> (μ-CO <sub>3</sub> )(CH <sub>3</sub> CN) <sub>2</sub> ](BPh <sub>4</sub> ) <sub>2</sub> (CH <sub>3</sub> CN) <sub>2</sub> <b>2a</b> |            |                 |            |                 |          |
| Bond Distance                                                                                                                                            |            |                 |            |                 |          |
| Ni(1)-N(1)                                                                                                                                               | 2.146(3)   | Ni(2)-N(5)      | 2.138(4)   | Ni(2)-N(8)      | 2.077(4) |
| Ni(1)-N(2)                                                                                                                                               | 2.066(3)   | Ni(2)-N(6)      | 2.075(3)   | Ni(1)-O(1)      | 2.041(3) |
| Ni(1)-N(3)                                                                                                                                               | 2.105(3)   | Ni(2)-N(7)      | 2.127(3)   | Ni(2)-O(2)      | 2.029(3) |
| Ni(1)-N(4)                                                                                                                                               | 2.088(4)   |                 |            |                 |          |
| Bond Angle                                                                                                                                               |            |                 |            |                 |          |
| N(2)-Ni(1)-O(1)                                                                                                                                          | 165.60(13) | N(6)-Ni(2)-O(2) | 170.62(13) |                 |          |
| N(4)-Ni(1)-O(1)                                                                                                                                          | 95.80(14)  | N(8)-Ni(2)-O(2) | 89.02(13)  |                 |          |
| N(4)-Ni(1)-N(2)                                                                                                                                          | 97.37(15)  | N(6)-Ni(2)-N(8) | 98.17(15)  |                 |          |
| N(3)-Ni(1)-O(1)                                                                                                                                          | 91.38(13)  | N(7)-Ni(2)-O(2) | 92.17(12)  |                 |          |
| N(2)-Ni(1)-N(3)                                                                                                                                          | 94.70(14)  | N(6)-Ni(2)-N(7) | 93.71(14)  |                 |          |
| N(4)-Ni(1)-N(3)                                                                                                                                          | 88.82(15)  | N(7)-Ni(2)-N(8) | 90.95(15)  |                 |          |
| N(1)-Ni(1)-O(1)                                                                                                                                          | 97.08(13)  | N(5)-Ni(2)-O(2) | 97.57(13)  |                 |          |
| N(1)-Ni(1)-N(2)                                                                                                                                          | 77.01(14)  | N(5)-Ni(2)-N(6) | 76.21(15)  |                 |          |
| N(1)-Ni(1)-N(4)                                                                                                                                          | 90.57(15)  | N(8)-Ni(1)-N(5) | 92.42(15)  |                 |          |
| N(1)-Ni(1)-N(3)                                                                                                                                          | 171.54(14) | N(7)-Ni(2)-N(5) | 169.74(14) |                 |          |

<sup>a</sup>Standard deviations in parenthesis

**Table S6.** Selected bond distances<sup>a</sup> (Å) bond angles<sup>a</sup> (°) for **4a**.

---

| [(L4Ni) <sub>2</sub> (μ-CO <sub>3</sub> )(H <sub>2</sub> O) <sub>2</sub> (C <sub>3</sub> H <sub>6</sub> O)](ClO <sub>4</sub> ) <sub>2</sub> <b>4a</b> |           |                 |            |            |          |
|-------------------------------------------------------------------------------------------------------------------------------------------------------|-----------|-----------------|------------|------------|----------|
| Bond Distance                                                                                                                                         |           |                 |            |            |          |
| Ni(1)-N(1)                                                                                                                                            | 2.055(5)  | Ni(2)-N(5)      | 2.075(5)   | Ni(2)-O(6) | 2.221(4) |
| Ni(1)-N(2)                                                                                                                                            | 2.070(5)  | Ni(2)-N(6)      | 2.112(6)   | Ni(1)-O(1) | 2.054(4) |
| Ni(1)-N(3)                                                                                                                                            | 2.096(5)  | Ni(2)-N(4)      | 2.052(4)   | Ni(2)-O(2) | 2.064(4) |
| Ni(1)-O(4)                                                                                                                                            | 2.249(4)  |                 |            |            |          |
| Bond Angle                                                                                                                                            |           |                 |            |            |          |
| N(1)-Ni(1)-N(2)                                                                                                                                       | 81.9(2)   | O(6)-Ni(2)-N(4) | 94.0(2)    |            |          |
| O(1)-Ni(1)-N(1)                                                                                                                                       | 96.88(2)  | O(2)-Ni(2)-N(4) | 95.42(19)  |            |          |
| O(1)-Ni(1)-N(2)                                                                                                                                       | 168.58(5) | O(6)-Ni(2)-O(2) | 97.33(17)  |            |          |
| O(1)-Ni(1)-O(4)                                                                                                                                       | 97.66(17) | N(4)-Ni(2)-N(5) | 82.7(2)    |            |          |
| N(1)-Ni(1)-O(4)                                                                                                                                       | 93.2(2)   | O(6)-Ni(2)-N(5) | 171.08(17) |            |          |
| N(2)-Ni(1)-O(4)                                                                                                                                       | 93.74(19) | N(4)-Ni(2)-N(6) | 159.4(2)   |            |          |
| O(1)-Ni(1)-N(3)                                                                                                                                       | 101.8(2)  | N(4)-Ni(2)-N(6) | 91.7(2)    |            |          |
| N(3)-Ni(1)-N(1)                                                                                                                                       | 159.6(2)  | O(2)-Ni(2)-N(6) | 103.44(19) |            |          |
| N(2)-Ni(1)-N(3)                                                                                                                                       | 78.2(2)   | N(5)-Ni(2)-N(6) | 74.4(2)    |            |          |
| N(3)-Ni(1)-O(4)                                                                                                                                       | 92.34(19) | N(4)-Ni(2)-O(2) | 87.63(5)   |            |          |

---

**Table S7.** Crystal data and structure refinement for complexes **1**, **1a**, **2a** and **4a**.

|                                      | <b>1</b>                                                        | <b>1a</b>                                                                                    | <b>2a</b>                                                                                     | <b>4a</b>                                                                                      |
|--------------------------------------|-----------------------------------------------------------------|----------------------------------------------------------------------------------------------|-----------------------------------------------------------------------------------------------|------------------------------------------------------------------------------------------------|
| Formula                              | NiC <sub>67</sub> H <sub>68</sub> B <sub>2</sub> N <sub>6</sub> | Ni <sub>2</sub> C <sub>77</sub> H <sub>86</sub> B <sub>2</sub> N <sub>8</sub> O <sub>4</sub> | Ni <sub>2</sub> C <sub>83</sub> H <sub>94</sub> B <sub>2</sub> N <sub>10</sub> O <sub>3</sub> | Ni <sub>2</sub> C <sub>34</sub> H <sub>64</sub> Cl <sub>2</sub> N <sub>6</sub> O <sub>18</sub> |
| Fw                                   | 1044.60                                                         | 1326.57                                                                                      | 1418.72                                                                                       | 1033.23                                                                                        |
| Crystal system                       | Monoclinic                                                      | Triclinic                                                                                    | Orthorhombic                                                                                  | Orthorhombic                                                                                   |
| Space group                          | P 21/c                                                          | P-1                                                                                          | P n a21                                                                                       | P 21 21 21                                                                                     |
| Temperature                          | 293(2) K                                                        | 291(2) K                                                                                     | 291(2) K                                                                                      | 291(4) K                                                                                       |
| a/Å                                  | 24.8742(10)                                                     | 13.9721(5)                                                                                   | 31.3574(16)                                                                                   | 11.7462(7)                                                                                     |
| b/Å                                  | 17.6602(8)                                                      | 14.2148(5)                                                                                   | 11.0783(5)                                                                                    | 15.1861(9)                                                                                     |
| c/Å <sup>0</sup>                     | 26.6397(11)                                                     | 20.9208(10)                                                                                  | 21.4842(10)                                                                                   | 25.9560(16)                                                                                    |
| α <sup>0</sup>                       | 90                                                              | 92.908(3)                                                                                    | 90                                                                                            | 90                                                                                             |
| β <sup>0</sup>                       | 96.624(4)                                                       | 106.598(3)                                                                                   | 90                                                                                            | 90                                                                                             |
| γ <sup>0</sup>                       | 90                                                              | 113.393(3)                                                                                   | 90                                                                                            | 90                                                                                             |
| Volume/Å <sup>3</sup>                | 11624.3(9)                                                      | 3590.5(3)                                                                                    | 7463.3(6)                                                                                     | 4630.0(5)                                                                                      |
| Z                                    | 4                                                               | 2                                                                                            | 4                                                                                             | 4                                                                                              |
| ρ <sub>calc</sub> mg/mm <sup>3</sup> | 1.196                                                           | 1.227                                                                                        | 1.263                                                                                         | 1.482                                                                                          |
| μ/mm <sup>-1</sup>                   | 0.380                                                           | 0.578                                                                                        | 0.561                                                                                         | 1.005                                                                                          |
| F(000)                               | 4440                                                            | 1404.0                                                                                       | 3008.0                                                                                        | 2176                                                                                           |
| Reflection collected                 | 26525                                                           | 14089                                                                                        | 12818                                                                                         | 12549                                                                                          |
| Goodness-of-fit on F <sup>2</sup>    | 1.020                                                           | 1.023                                                                                        | 1.038                                                                                         | 1.022                                                                                          |
| R1 <sup>a</sup>                      | 0.0942                                                          | 0.0494                                                                                       | 0.0396                                                                                        | 0.0552                                                                                         |
| wR2 <sup>b</sup>                     | 0.2901                                                          | 0.1228                                                                                       | 0.0708                                                                                        | 0.1285                                                                                         |

$$R1 = \frac{\sum | |F_o| - |F_c| |}{\sum |F_o|} \quad WR2 = \frac{\sum w[(F_o - F_c)^2]}{\sum w[(F_o^2)^2]}^{1/2}$$

## Reply for A and B-level Check CIF alerts

### Complex 1

PLAT330\_ALERT\_2\_A Large Aver Phenyl C-C Dist C105--C110. 1.43 Ang.  
PLAT330\_ALERT\_2\_A Large Aver Phenyl C-C Dist C117--C122. 1.43 Ang.  
PLAT331\_ALERT\_2\_A Small Aver Phenyl C-C Dist C57--C62. 1.34 Ang.  
PLAT331\_ALERT\_2\_A Small Aver Phenyl C-C Dist C69--C74. 1.35 Ang.  
PLAT331\_ALERT\_2\_A Small Aver Phenyl C-C Dist C111--C116. 1.34 Ang.  
PLAT330\_ALERT\_2\_B Large Aver Phenyl C-C Dist C75--C80. 1.43 Ang.  
PLAT330\_ALERT\_2\_B Large Aver Phenyl C-C Dist C81--C86. 1.42 Ang.  
PLAT331\_ALERT\_2\_B Small Aver Phenyl C-C Dist C63--C68. 1.36 Ang.  
PLAT331\_ALERT\_2\_B Small Aver Phenyl C-C Dist C87--C92. 1.35 Ang.  
PLAT331\_ALERT\_2\_B Small Aver Phenyl C-C Dist C93--C98. 1.35 Ang.

**Author Response:** These alerts are generated by the possible disorder or substantial thermal mobility of the tetraphenylamines.

PLAT213\_ALERT\_2\_B Atom C30 has ADP max/min Ratio..... 4.6 prolat

**Author Response:** These alerts are generated because there is a large amount of disorder in the structure.

PLAT410\_ALERT\_2\_B Short Intra H...H Contact H24A..H27B. 1.82 Ang.

x,y,z = 1\_555 Check

**Author Response:** The crystal was weakly diffracting and thus the quality of data is \ relatively poor. For that, the hydrogen atoms were included in geometrically calculated position and were refined according to the riding model.

PLAT910\_ALERT\_3\_B Missing # of FCF Reflection(s) Below Theta (Min). 45 Note

**Author Response:** The unit cell is reasonable large and these low angle reflections are probably missing due to the beamstop.

### **Complex-1a**

PLAT420\_ALERT\_2\_B D-H Without Acceptor O22 --H22C. Please Check

**Author Response:** The bond O4-H40 is directed to a cavity whose disordered atomic content has been removed by SQUEEZE.
